# Supplementary material for: HepatoDyn: A Dynamic Model of Hepatocyte Metabolism That Integrates 13C Isotopomer Data
Source: PubMed Central journal article supplement (PMC4849781; doi:10.1371/journal.pcbi.1004899), 2016-04-28
Supplement: pcbi.1004899.s011.pdf [file pcbi.1004899.s011.pdf]

**S2 Table. Reactions included in the model.** This table describes all the reactions included in the metabolic network used in the model and indicates abbreviation, full name and stoichiometry. In reaction stoichiometry,  $\leftrightarrow$  denotes reversible reactions and  $\rightarrow$  denotes irreversible reactions.

| Reaction id         | Reaction name                              | Reaction stoichiometry                                                                |
|---------------------|--------------------------------------------|---------------------------------------------------------------------------------------|
| <b>aatc</b>         | Aspartate aminotransferase (Cytosolic)     | $cAsp + cKg \leftrightarrow cGlu + cOAA$                                              |
| <b>aatm</b>         | Aspartate aminotransferase (Mitochondrial) | $mAsp + mKg \leftrightarrow mGlu + mOAA$                                              |
| <b>aco</b>          | Aconitase                                  | $mCit \leftrightarrow miCit$                                                          |
| <b>acoacar</b>      | Acetyl-CoA carboxylase                     | $cACoA + cATP + CO_2 \rightarrow cADP + cPi + MalCoA$                                 |
| <b>adk</b>          | Adenylate kinase                           | $AMP + cATP \leftrightarrow 2cADP$                                                    |
| <b>aldo1</b>        | Aldolase (1)                               | $Fru16bP \leftrightarrow DhaP + GraP$                                                 |
| <b>aldo2</b>        | Aldolase (2)                               | $Fru1P \leftrightarrow DhaP + Gra$                                                    |
| <b>aldo3</b>        | Aldolase (3)                               | $Fru16bP + Gra \leftrightarrow Fru1P + GraP$                                          |
| <b>aldo_inv1</b>    | Aldolase invisible (1)                     | $Fru16bP + GraP \leftrightarrow Fru16bP + GraP$                                       |
| <b>aldo_inv2</b>    | Aldolase invisible (2)                     | $Fru1P + Gra \leftrightarrow Fru1P + Gra$                                             |
| <b>aspglumtrans</b> | Aspartate/Glutamate carrier                | $cGlu + mAsp \leftrightarrow cAsp + mGlu$                                             |
| <b>atpase</b>       | Atpase                                     | $cATP \rightarrow cADP + cPi$                                                         |
| <b>atpmtrans</b>    | Mitochondrial ATP/ADP carrier              | $cADP + mATP \leftrightarrow cATP + mADP$                                             |
| <b>box</b>          | $\beta$ -Oxidation                         | $cATP + 7CoQ + cPalm + 8mCoA + 7mNAD \rightarrow AMP + 7CoQH + 8mACoA + 7mNADH + PPi$ |
| <b>citly</b>        | Citrate lyase                              | $cATP + cCit + cCoA \leftrightarrow cACoA + cADP + cOAA + cPi$                        |
| <b>citmtr</b>       | Citrate carrier                            | $cMal + mCit \leftrightarrow cCit + mMal$                                             |
| <b>cmdh</b>         | Malate dehydrogenase (Cytosolic)           | $cMal + cNAD \leftrightarrow cNADH + cOAA$                                            |
| <b>cndk1</b>        | Nucleoside diphosphate kinase 1(Cytosolic) | $cATP + cGDP \leftrightarrow cADP + cGTP$                                             |
| <b>cndk2</b>        | Nucleoside diphosphate kinase 2(Cytosolic) | $cATP + UDP \leftrightarrow cADP + UTP$                                               |
| <b>coqhoxi</b>      | Ubiquinol Oxidase                          | $CoQH + 2mADP + 2mPi \rightarrow CoQ + 2mATP$                                         |
| <b>cs</b>           | Citrate synthase                           | $mACoA + mOAA \rightarrow mCit + mCoA$                                                |
| <b>dic</b>          | Dicarboxylate Carrier                      | $cPi + mMal \leftrightarrow cMal + mPi$                                               |
| <b>eno</b>          | Enolase                                    | $PG2 \leftrightarrow PEP$                                                             |
| <b>fasyn</b>        | Fatty acid synthesis                       | $cACoA + 7MalCoA + 14NADPH \rightarrow 8cCoA + cPalm + 14NADP$                        |
| <b>fbasea1</b>      | Fructose 1,6-bisphosphatase (Pool A)       | $Fru16bP \rightarrow cPi + Fru6Pa$                                                    |
| <b>fbasea2</b>      | Fructose 2,6-bisphosphatase (Pool A)       | $Fru26bPa \rightarrow cPi + Fru6Pa$                                                   |
| <b>fbaseb1</b>      | Fructose 1,6-bisphosphatase (Pool B)       | $Fru16bP \rightarrow cPi + Fru6Pb$                                                    |
| <b>fbaseb2</b>      | Fructose 2,6-bisphosphatase (Pool B)       | $Fru26bPb \rightarrow cPi + Fru6Pb$                                                   |
| <b>fh</b>           | Fumarate Hydratase                         | $Fum \leftrightarrow mMal$                                                            |
| <b>fruhk</b>        | Fructokinase                               | $cATP + cFru \rightarrow cADP + Fru1P$                                                |
| <b>frutr</b>        | Fructose carrier                           | $eFru \leftrightarrow cFru$                                                           |
| <b>g6pasea</b>      | Glucose-6-Phosphatase (Pool A)             | $Glc6Pa \rightarrow cGlc + cPi$                                                       |

|                    |                                                 |                                                                                                            |
|--------------------|-------------------------------------------------|------------------------------------------------------------------------------------------------------------|
| <b>g6paseb</b>     | Glucose-6-Phosphatase (Pool B)                  | $\text{Glc6Pb} \rightarrow \text{cGlc} + \text{cPi}$                                                       |
| <b>g6pdh</b>       | Glucose-6-Phosphate deshydrogenase              | $\text{Glc6Pa} + \text{NADP} \rightarrow \text{NADPH} + \text{PGn}$                                        |
| <b>gapdh</b>       | Glyceraldehyde 3-phosphate dehydrogenase        | $\text{cNAD} + \text{cPi} + \text{GraP} \leftrightarrow \text{bPG13} + \text{cNADH}$                       |
| <b>gka</b>         | Glucokinase (Pool A)                            | $\text{cATP} + \text{cGlc} \rightarrow \text{cADP} + \text{Glc6Pa}$                                        |
| <b>gkb</b>         | Glucokinase (Pool B)                            | $\text{cATP} + \text{cGlc} \rightarrow \text{cADP} + \text{Glc6Pb}$                                        |
| <b>glctr</b>       | Glucose carrier                                 | $\text{eGlc} \leftrightarrow \text{cGlc}$                                                                  |
| <b>glutr</b>       | Glutamate carrier                               | $\text{eGlu} \leftrightarrow \text{cGlu}$                                                                  |
| <b>glyc3pcdh</b>   | Glycerol-3-phosphate dehydrogenase (NAD)        | $\text{cNAD} + \text{Glyc3P} \leftrightarrow \text{cNADH} + \text{DhaP}$                                   |
| <b>glyc3pmdh</b>   | Glycerol-3-phosphate dehydrogenase (Ubiquinone) | $\text{CoQ} + \text{Glyc3P} \rightarrow \text{CoQH} + \text{DhaP}$                                         |
| <b>gp</b>          | Glycogen Phosphorylase                          | $\text{cPi} + \text{GlyGlc} \rightarrow \text{Glc1P}$                                                      |
| <b>gpia</b>        | Glucose-6-Phosphate-Isomerase (Pool A)          | $\text{Glc6Pa} \leftrightarrow \text{Fru6Pa}$                                                              |
| <b>gpib</b>        | Glucose-6-Phosphate-Isomerase (Pool A)          | $\text{Glc6Pb} \leftrightarrow \text{Fru6Pb}$                                                              |
| <b>gs</b>          | Glycogen synthase                               | $\text{UDPGlc} \rightarrow \text{GlyGlc} + \text{UDP}$                                                     |
| <b>idh</b>         | Isocitrate dehydrogenase                        | $\text{miCit} + \text{mNAD} \leftrightarrow \text{CO}_2 + \text{mKg} + \text{mNADH}$                       |
| <b>kdh</b>         | $\alpha$ -Ketoglutarate dehydrogenase           | $\text{mCoA} + \text{mKg} + \text{mNAD} \leftrightarrow \text{CO}_2 + \text{mNADH} + \text{SuCoA}$         |
| <b>lactr</b>       | Lactate carrier                                 | $\text{eLac} \leftrightarrow \text{cLac}$                                                                  |
| <b>ldh</b>         | Lactate dehydrogenase                           | $\text{cLac} + \text{cNAD} \leftrightarrow \text{cNADH} + \text{cPyr}$                                     |
| <b>malic</b>       | Malic enzyme                                    | $\text{cMal} + \text{NADP} \leftrightarrow \text{CO}_2 + \text{cPyr} + \text{NADPH}$                       |
| <b>malkgmtrans</b> | $\alpha$ -Ketoglutarate/Malate carrier          | $\text{cMal} + \text{mKg} \leftrightarrow \text{cKg} + \text{mMal}$                                        |
| <b>mmdh</b>        | Malate dehydrogenase (Mitochondrial)            | $\text{mMal} + \text{mNAD} \leftrightarrow \text{mNADH} + \text{mOAA}$                                     |
| <b>mndk</b>        | Nucleoside diphosphate kinase (Mitochondrial)   | $\text{mATP} + \text{mGDP} \leftrightarrow \text{mADP} + \text{mGTP}$                                      |
| <b>mpyrtr</b>      | Mitochondrial pyruvate carrier                  | $\text{cPyr} \leftrightarrow \text{mPyr}$                                                                  |
| <b>nadhhdh</b>     | NADH dehydrogenase                              | $\text{CoQ} + \text{mADP} + \text{mNADH} + \text{mPi} \rightarrow \text{CoQH} + \text{mATP} + \text{mNAD}$ |
| <b>pc</b>          | Pyruvate Carboxylase                            | $\text{CO}_2 + \text{mATP} + \text{mPyr} \leftrightarrow \text{mADP} + \text{mOAA} + \text{mPi}$           |
| <b>pdh</b>         | Pyruvate dehydrogenase                          | $\text{mCoA} + \text{mNAD} + \text{mPyr} \rightarrow \text{CO}_2 + \text{mACoA} + \text{mNADH}$            |
| <b>pepck</b>       | Phosphoenolpyruvate carboxykinase               | $\text{cGTP} + \text{cOAA} \leftrightarrow \text{cGDP} + \text{CO}_2 + \text{PEP}$                         |
| <b>pfkla1</b>      | Phosphofructokinase 1(Pool A)                   | $\text{cATP} + \text{Fru6Pa} \rightarrow \text{cADP} + \text{Fru16bP}$                                     |
| <b>pfkla2</b>      | Phosphofructokinase-2 (Pool A)                  | $\text{cATP} + \text{Fru6Pa} \rightarrow \text{cADP} + \text{Fru26bPa}$                                    |
| <b>pfklb1</b>      | Phosphofructokinase 1(Pool B)                   | $\text{cATP} + \text{Fru6Pb} \rightarrow \text{cADP} + \text{Fru16bP}$                                     |
| <b>pfklb2</b>      | Phosphofructokinase-2 (Pool B)                  | $\text{cATP} + \text{Fru6Pb} \rightarrow \text{cADP} + \text{Fru26bPb}$                                    |
| <b>pgk</b>         | Phosphoglycerate kinase                         | $\text{bPG13} + \text{cADP} \leftrightarrow \text{cATP} + \text{PG3}$                                      |
| <b>pglm</b>        | Phosphoglucomutase                              | $\text{Glc1P} \leftrightarrow \text{Glc6Pb}$                                                               |
| <b>pgm</b>         | Phosphoglycerate mutase                         | $\text{PG3} \leftrightarrow \text{PG2}$                                                                    |
| <b>pgndh</b>       | Phosphogluconate dehydrogenase                  | $\text{NADP} + \text{PGn} \rightarrow \text{CO}_2 + \text{NADPH} + \text{Ru5P}$                            |

|                 |                                  |                                                                                                  |
|-----------------|----------------------------------|--------------------------------------------------------------------------------------------------|
| <b>pimtr</b>    | Phosphate mitochondrial carrier  | $c\text{Pi} \leftrightarrow m\text{Pi}$                                                          |
| <b>pitr</b>     | Phosphate carrier                | $e\text{Pi} \leftrightarrow c\text{Pi}$                                                          |
| <b>pyrtr</b>    | Pyruvate extracellular carrier   | $e\text{Pyr} \leftrightarrow c\text{Pyr}$                                                        |
| <b>pk</b>       | Pyruvate kinase                  | $c\text{ADP} + \text{PEP} \rightarrow c\text{ATP} + c\text{Pyr}$                                 |
| <b>ppase</b>    | Pyrophosphatase                  | $\text{PPi} \rightarrow 2c\text{Pi}$                                                             |
| <b>rpi</b>      | Ribose-5-phosphate isomerase     | $\text{Ru5P} \leftrightarrow \text{Rib5P}$                                                       |
| <b>rul5pepi</b> | Ribulose-5-phosphate 4-epimerase | $\text{Ru5P} \leftrightarrow \text{Xyl5P}$                                                       |
| <b>scs</b>      | Succinyl-CoA synthetase          | $m\text{GDP} + m\text{Pi} + \text{SuCoA} \leftrightarrow m\text{CoA} + m\text{GTP} + \text{Suc}$ |
| <b>sdh</b>      | Succinate dehydrogenase          | $\text{CoQ} + \text{Suc} \leftrightarrow \text{CoQH} + \text{Fum}$                               |
| <b>ta</b>       | Transaldolase                    | $\text{E4P} + \text{Fru6Pa} \leftrightarrow \text{GraP} + \text{Sed7P}$                          |
| <b>ta_inv1</b>  | Transaldolase invisible (1)      | $\text{Fru6Pa} + \text{GraP} \leftrightarrow \text{Fru6Pa} + \text{GraP}$                        |
| <b>ta_inv2</b>  | Transaldolase invisible (2)      | $\text{E4P} + \text{Sed7P} \leftrightarrow \text{E4P} + \text{Sed7P}$                            |
| <b>tim</b>      | Triose-phosphate isomerase       | $\text{DhaP} \leftrightarrow \text{GraP}$                                                        |
| <b>tk1</b>      | Transketolase (1)                | $\text{Xyl5P} + \text{Rib5P} \leftrightarrow \text{GraP} + \text{Sed7P}$                         |
| <b>tk2</b>      | Transketolase (2)                | $\text{GraP} + \text{Fru6Pa} \leftrightarrow \text{Xyl5P} + \text{E4P}$                          |
| <b>tk3</b>      | Transketolase (3)                | $\text{Fru6Pa} + \text{Rib5P} \leftrightarrow \text{E4P} + \text{Sed7P}$                         |
| <b>tk_inv1</b>  | Transketolase invisible (1)      | $\text{Xyl5P} + \text{Grap} \leftrightarrow \text{Xyl5P} + \text{Grap}$                          |
| <b>tk_inv2</b>  | Transketolase invisible (2)      | $\text{Fru6Pa} + \text{E4P} \leftrightarrow \text{Fru6Pa} + \text{E4P}$                          |
| <b>tk_inv3</b>  | Transketolase invisible (3)      | $\text{Rib5P} + \text{Sed7P} \leftrightarrow \text{Rib5P} + \text{Sed7P}$                        |
| <b>transa</b>   | Transaminase                     | $c\text{Kg} \leftrightarrow c\text{Glu}$                                                         |
| <b>trik</b>     | Triokinase                       | $c\text{ATP} + \text{Gra} \rightarrow c\text{ADP} + \text{GraP}$                                 |
| <b>ugt</b>      | UDP-glucuronosyltransferase      | $\text{Glc1P} + \text{UTP} \leftrightarrow \text{PPi} + \text{UDPGlc}$                           |
