# Supplementary material for: HepatoDyn: A Dynamic Model of Hepatocyte Metabolism That Integrates 13C Isotopomer Data
Source: PubMed Central journal article supplement (PMC4849781; doi:10.1371/journal.pcbi.1004899), 2016-04-28
Supplement: pcbi.1004899.s012.pdf [file pcbi.1004899.s012.pdf]

**S3 Table: Compartments included in the model.** This table describes the three compartments included in the model and their volumes.

| Compartment   | Volume                              | Reference |
|---------------|-------------------------------------|-----------|
| Cytosol       | $1.5 \cdot 10^{-12} \frac{l}{cell}$ | [1, 2]    |
| Mitochondria  | $7.5 \cdot 10^{-13} \frac{l}{cell}$ | [1, 2]    |
| Extracellular | 1 l                                 |           |

#### References

1. Uhal BD, Roehrig KL. Effect of dietary state on hepatocyte size. Biosci Rep. 1982;2(12):1003-7. Epub 1982/12/01. PubMed PMID: 7165791.
2. Kuntz E. Hepatology, textbook and atlas. 3rd ed. New York: Springer; 2008.
