# Supplementary material for: HepatoDyn: A Dynamic Model of Hepatocyte Metabolism That Integrates 13C Isotopomer Data
Source: PubMed Central journal article supplement (PMC4849781; doi:10.1371/journal.pcbi.1004899), 2016-04-28
Supplement: pcbi.1004899.s013.pdf [file pcbi.1004899.s013.pdf]

**S4 Table. Parameters of the kinetic model.** This table describes all the parameters of the kinetic model sorted by the reaction(s) to which they are associated.

| Reaction(s) id | Reaction(s) name                           | Parameter | Value    | Units                                                  | Reference |
|----------------|--------------------------------------------|-----------|----------|--------------------------------------------------------|-----------|
| <b>aatc</b>    | Aspartate aminotransferase (Cytosolic)     | V         | Fitted   | $\text{pmol}\cdot\text{min}^{-1}\cdot\text{cell}^{-1}$ |           |
| <b>aatc</b>    | Aspartate aminotransferase (Cytosolic)     | Keq       | 0.151515 | –                                                      | [1]       |
| <b>aatc</b>    | Aspartate aminotransferase (Cytosolic)     | kAsp      | 0.35     | mM                                                     | [2]       |
| <b>aatc</b>    | Aspartate aminotransferase (Cytosolic)     | kiAsp     | 1.6      | mM                                                     | [2]       |
| <b>aatc</b>    | Aspartate aminotransferase (Cytosolic)     | kKg       | 1.25     | mM                                                     |           |
| <b>aatc</b>    | Aspartate aminotransferase (Cytosolic)     | kOAA      | 2.05     | mM                                                     | [2]       |
| <b>aatc</b>    | Aspartate aminotransferase (Cytosolic)     | kiOAA     | 2.05     | mM                                                     |           |
| <b>aatc</b>    | Aspartate aminotransferase (Cytosolic)     | kGlu      | 0.38     | mM                                                     | [2]       |
| <b>aatc</b>    | Aspartate aminotransferase (Cytosolic)     | kiGlu     | 2.4      | mM                                                     | [2]       |
| <b>aatm</b>    | Aspartate aminotransferase (Mitochondrial) | V         | Fitted   | $\text{pmol}\cdot\text{min}^{-1}\cdot\text{cell}^{-1}$ |           |
| <b>aatm</b>    | Aspartate aminotransferase (Mitochondrial) | Keq       | 0.151515 | –                                                      | [1]       |
| <b>aatm</b>    | Aspartate aminotransferase (Mitochondrial) | kAsp      | 0.75     | mM                                                     | [2]       |
| <b>aatm</b>    | Aspartate aminotransferase (Mitochondrial) | kiAsp     | 1.9      | mM                                                     | [2]       |
| <b>aatm</b>    | Aspartate aminotransferase (Mitochondrial) | kKg       | 1.75     | mM                                                     | [2]       |
| <b>aatm</b>    | Aspartate aminotransferase (Mitochondrial) | kOAA      | 1.85     | mM                                                     | [2]       |
| <b>aatm</b>    | Aspartate aminotransferase (Mitochondrial) | kiOAA     | 1.85     | mM                                                     |           |
| <b>aatm</b>    | Aspartate aminotransferase (Mitochondrial) | kGlu      | 0.48     | mM                                                     | [2]       |
| <b>aatm</b>    | Aspartate aminotransferase (Mitochondrial) | kiGlu     | 1.8      | mM                                                     | [2]       |
| <b>aco</b>     | Aconitase                                  | V         | 2        | $\text{pmol}\cdot\text{min}^{-1}\cdot\text{cell}^{-1}$ |           |
| <b>aco</b>     | Aconitase                                  | KCit      | 0.48     | mM                                                     | [3]       |
| <b>aco</b>     | Aconitase                                  | KiCit     | 0.12     | mM                                                     | [3]       |
| <b>aco</b>     | Aconitase                                  | Keq       | 0.556    | –                                                      | [1]       |
| <b>acoacar</b> | Acetyl-CoA carboxylase                     | V         | Fitted   | $\text{pmol}\cdot\text{min}^{-1}\cdot\text{cell}^{-1}$ |           |

|                                                         |                                                                                              |        |         |                                            |     |
|---------------------------------------------------------|----------------------------------------------------------------------------------------------|--------|---------|--------------------------------------------|-----|
| <b>acoacar</b>                                          | Acetyl-CoA carboxylase                                                                       | KATP   | 0.015   | mM                                         | [4] |
| <b>acoacar</b>                                          | Acetyl-CoA carboxylase                                                                       | KACoA  | 0.025   | mM                                         | [4] |
| <b>acoacar</b>                                          | Acetyl-CoA carboxylase                                                                       | KCO2   | 2.5     | mM                                         | [4] |
| <b>acoacar</b>                                          | Acetyl-CoA carboxylase                                                                       | KCit   | 0.8     | mM                                         |     |
| <b>acoacar</b>                                          | Acetyl-CoA carboxylase                                                                       | KiPalm | 0.4     | mM                                         |     |
| <b>adk</b>                                              | Adenylate kinase                                                                             | V      | 2       | pmol·min <sup>-1</sup> ·cell <sup>-1</sup> |     |
| <b>adk</b>                                              | Adenylate kinase                                                                             | Keq    | 0.95    | _                                          | [5] |
| <b>adk</b>                                              | Adenylate kinase                                                                             | KiAMP  | 0.18    | mM                                         | [6] |
| <b>adk</b>                                              | Adenylate kinase                                                                             | KATP   | 0.23    | mM                                         | [6] |
| <b>adk</b>                                              | Adenylate kinase                                                                             | KiATP  | 0.23    | mM                                         |     |
| <b>adk</b>                                              | Adenylate kinase                                                                             | KADP   | 0.15    | mM                                         | [6] |
| <b>adk</b>                                              | Adenylate kinase                                                                             | KiADP  | 0.15    | mM                                         |     |
| <b>aldo1/<br/>aldo2/aldo3/aldo_inv1/<br/>aldo_inv2</b>  | Aldolase (1) / Aldolase (2) / Aldolase (3) / Aldolase invisible (1) / Aldolase invisible (3) | E0     | Fitted  | pmol·cell <sup>-1</sup> <sub>1</sub>       |     |
| <b>aldo1/<br/>aldo2/aldo3/aldo_inv1<br/>/aldo_inv2</b>  | Aldolase (1) / Aldolase (2) / Aldolase (3) / Aldolase invisible (1) / Aldolase invisible (3) | K1     | 4405.64 | min <sup>-1</sup>                          |     |
| <b>aldo1/<br/>aldo2/aldo3/aldo_inv1<br/>/aldo_inv2</b>  | Aldolase (1) / Aldolase (2) / Aldolase (3) / Aldolase invisible (1) / Aldolase invisible (3) | K2     | 10      | min <sup>-1</sup>                          |     |
| <b>aldo1/<br/>aldo2/aldo3/aldo_inv1<br/>/aldo_inv2</b>  | Aldolase (1) / Aldolase (2) / Aldolase (3) / Aldolase invisible (1) / Aldolase invisible (3) | K3     | 10      | min <sup>-1</sup>                          |     |
| <b>aldo1/<br/>aldo2/aldo3/aldo_inv1/<br/>aldo_inv2</b>  | Aldolase (1) / Aldolase (2) / Aldolase (3) / Aldolase invisible (1) / Aldolase invisible (3) | K4     | 2.1896  | min <sup>-1</sup>                          |     |
| <b>aldo1/<br/>aldo2/aldo3/aldo_inv1/<br/>/aldo_inv2</b> | Aldolase (1) / Aldolase (2) / Aldolase (3) / Aldolase invisible (1) / Aldolase invisible (3) | K5     | 10      | min <sup>-1</sup>                          |     |

|                                                        |                                                                                                |        |           |                                            |     |
|--------------------------------------------------------|------------------------------------------------------------------------------------------------|--------|-----------|--------------------------------------------|-----|
| <b>aldo_inv2</b>                                       |                                                                                                |        |           |                                            |     |
| <b>aldo1/<br/>aldo2/aldo3/aldo_inv1/<br/>aldo_inv2</b> | Aldolase (1) / Aldolase (2) / Aldolase (3) / Aldolase invisible (1)<br>/Aldolase invisible (3) | Kr1    | 4.09804   | min <sup>-1</sup>                          |     |
| <b>aldo1/<br/>aldo2/aldo3/aldo_inv1/<br/>aldo_inv2</b> | Aldolase (1) / Aldolase (2) / Aldolase (3) / Aldolase invisible (1)<br>/Aldolase invisible (3) | Kr2    | 1985.64   | min <sup>-1</sup>                          |     |
| <b>aldo1/<br/>aldo2/aldo3/aldo_inv1<br/>/aldo_inv2</b> | Aldolase (1) / Aldolase (2) / Aldolase (3) / Aldolase invisible (1)<br>/Aldolase invisible (3) | Kr3    | 112.583   | min <sup>-1</sup>                          |     |
| <b>aldo1/<br/>aldo2/aldo3/aldo_inv1<br/>/aldo_inv2</b> | Aldolase (1) / Aldolase (2) / Aldolase (3) / Aldolase invisible (1)<br>/Aldolase invisible (3) | Kr4    | 0.0721817 | min <sup>-1</sup>                          |     |
| <b>aldo1/<br/>aldo2/aldo3/aldo_inv1<br/>/aldo_inv2</b> | Aldolase (1) / Aldolase (2) / Aldolase (3) / Aldolase invisible (1)<br>/Aldolase invisible (3) | Kr5    | 1985.64   | min <sup>-1</sup>                          |     |
| <b>asplumtrans</b>                                     | Aspartate/Glutamate carrier                                                                    | V      | Fitted    | pmol·min <sup>-1</sup> ·cell <sup>-1</sup> |     |
| <b>asplumtrans</b>                                     | Aspartate/Glutamate carrier                                                                    | KimAsp | 2.8       | mM                                         | [7] |
| <b>asplumtrans</b>                                     | Aspartate/Glutamate carrier                                                                    | KcGlu  | 0.25      | mM                                         | [7] |
| <b>asplumtrans</b>                                     | Aspartate/Glutamate carrier                                                                    | KicGlu | 0.25      | mM                                         |     |
| <b>asplumtrans</b>                                     | Aspartate/Glutamate carrier                                                                    | KmGlu  | 3         | mM                                         | [7] |
| <b>asplumtrans</b>                                     | Aspartate/Glutamate carrier                                                                    | KimGlu | 3         | mM                                         |     |
| <b>asplumtrans</b>                                     | Aspartate/Glutamate carrier                                                                    | KicAsp | 0.12      | mM                                         | [7] |
| <b>asplumtrans</b>                                     | Aspartate/Glutamate carrier                                                                    | Keq    | 1         | –                                          |     |
| <b>atpase</b>                                          | Atpase                                                                                         | V      | Fitted    | pmol·min <sup>-1</sup> ·cell <sup>-1</sup> |     |
| <b>atpase</b>                                          | Atpase                                                                                         | KATP   | 0.5       | mM                                         |     |
| <b>atpmtrans</b>                                       | Mitochondrial ATP/ADP carrier                                                                  | V      | Fitted    | pmol·min <sup>-1</sup> ·cell <sup>-1</sup> |     |

|                  |                               |          |        |                                                        |     |
|------------------|-------------------------------|----------|--------|--------------------------------------------------------|-----|
| <b>atpmtrans</b> | Mitochondrial ATP/ADP carrier | Keq      | 10     | –                                                      |     |
| <b>atpmtrans</b> | Mitochondrial ATP/ADP carrier | KmATP    | 0.75   | mM                                                     |     |
| <b>atpmtrans</b> | Mitochondrial ATP/ADP carrier | KimATP   | 0.75   | mM                                                     |     |
| <b>atpmtrans</b> | Mitochondrial ATP/ADP carrier | KcADP    | 0.75   | mM                                                     |     |
| <b>atpmtrans</b> | Mitochondrial ATP/ADP carrier | kcATP    | 0.75   | mM                                                     |     |
| <b>atpmtrans</b> | Mitochondrial ATP/ADP carrier | kicATP   | 0.75   | mM                                                     |     |
| <b>atpmtrans</b> | Mitochondrial ATP/ADP carrier | kmADP    | 0.75   | mM                                                     |     |
| <b>atpmtrans</b> | Mitochondrial ATP/ADP carrier | kimADP   | 0.75   | mM                                                     |     |
| <b>box</b>       | $\beta$ -Oxidation            | V        | Fitted | $\text{pmol}\cdot\text{min}^{-1}\cdot\text{cell}^{-1}$ |     |
| <b>box</b>       | $\beta$ -Oxidation            | KPalm    | 0.05   | mM                                                     |     |
| <b>box</b>       | $\beta$ -Oxidation            | KATP     | 0.1    | mM                                                     |     |
| <b>box</b>       | $\beta$ -Oxidation            | KCoA     | 0.001  | mM                                                     |     |
| <b>box</b>       | $\beta$ -Oxidation            | KCoQ     | 0.0005 | mM                                                     |     |
| <b>box</b>       | $\beta$ -Oxidation            | KNAD     | 0.075  | mM                                                     |     |
| <b>box</b>       | $\beta$ -Oxidation            | KiMalCoA | 0.05   | mM                                                     |     |
| <b>citly</b>     | Citrate lyase                 | V        | Fitted | $\text{pmol}\cdot\text{min}^{-1}\cdot\text{cell}^{-1}$ |     |
| <b>citly</b>     | Citrate lyase                 | Keq      | 1000   | mM                                                     | [1] |
| <b>citly</b>     | Citrate lyase                 | KCit     | 0.11   | mM                                                     | [8] |
| <b>citly</b>     | Citrate lyase                 | KATP     | 0.16   | mM                                                     | [8] |
| <b>citly</b>     | Citrate lyase                 | KCoA     | 0.004  | mM                                                     | [8] |
| <b>citly</b>     | Citrate lyase                 | KACoA    | 0.001  | mM                                                     |     |
| <b>citly</b>     | Citrate lyase                 | KOAA     | 0.01   | mM                                                     |     |
| <b>citly</b>     | Citrate lyase                 | KADP     | 0.16   | mM                                                     |     |
| <b>citly</b>     | Citrate lyase                 | KPi      | 1      | mM                                                     |     |
| <b>citmtr</b>    | Citrate carrier               | V        | Fitted | $\text{pmol}\cdot\text{min}^{-1}\cdot\text{cell}^{-1}$ |     |
| <b>citmtr</b>    | Citrate carrier               | Keq      | 0.1    | mM                                                     |     |

|                     |                                                                                         |        |          |                                                        |      |
|---------------------|-----------------------------------------------------------------------------------------|--------|----------|--------------------------------------------------------|------|
| <b>citmtr</b>       | Citrate carrier                                                                         | KimCit | 0.027    | mM                                                     | [7]  |
| <b>citmtr</b>       | Citrate carrier                                                                         | KcMal  | 0.25     | mM                                                     | [7]  |
| <b>citmtr</b>       | Citrate carrier                                                                         | KicMal | 0.25     | mM                                                     |      |
| <b>citmtr</b>       | Citrate carrier                                                                         | KmMal  | 0.06     | mM                                                     | [7]  |
| <b>citmtr</b>       | Citrate carrier                                                                         | KimMal | 0.06     | mM                                                     |      |
| <b>citmtr</b>       | Citrate carrier                                                                         | KicCit | 0.032    | mM                                                     | [7]  |
| <b>cmdh</b>         | Malate dehydrogenase (Cytosolic)                                                        | V      | Fitted   | $\text{pmol}\cdot\text{min}^{-1}\cdot\text{cell}^{-1}$ |      |
| <b>cmdh</b>         | Malate dehydrogenase (Cytosolic)                                                        | Keq    | 0.000028 | _                                                      | [1]  |
| <b>cmdh</b>         | Malate dehydrogenase (Cytosolic)                                                        | kNAD   | 0.14     | mM                                                     | [9]  |
| <b>cmdh</b>         | Malate dehydrogenase (Cytosolic)                                                        | kiNAD  | 0.14     | mM                                                     |      |
| <b>cmdh</b>         | Malate dehydrogenase (Cytosolic)                                                        | kMal   | 8        | mM                                                     | [10] |
| <b>cmdh</b>         | Malate dehydrogenase (Cytosolic)                                                        | kiMal  | 8        | mM                                                     |      |
| <b>cmdh</b>         | Malate dehydrogenase (Cytosolic)                                                        | kOAA   | 0.0083   | mM                                                     | [11] |
| <b>cmdh</b>         | Malate dehydrogenase (Cytosolic)                                                        | kiOAA  | 0.0083   | mM                                                     |      |
| <b>cmdh</b>         | Malate dehydrogenase (Cytosolic)                                                        | kNADH  | 0.0205   | mM                                                     | [11] |
| <b>cmdh</b>         | Malate dehydrogenase (Cytosolic)                                                        | kiNADH | 0.0205   | mM                                                     |      |
| <b>cmdk1/ cmdk2</b> | Nucleoside diphosphate kinase 1(Cytosolic) / Nucleoside diphosphate kinase 2(Cytosolic) | V      | 2        | $\text{pmol}\cdot\text{min}^{-1}\cdot\text{cell}^{-1}$ |      |
| <b>cmdk1/ cmdk2</b> | Nucleoside diphosphate kinase 1(Cytosolic) / Nucleoside diphosphate kinase 2(Cytosolic) | Keq    | 1        | _                                                      | [1]  |
| <b>cmdk1/ cmdk2</b> | Nucleoside diphosphate kinase 1(Cytosolic) / Nucleoside diphosphate kinase 2(Cytosolic) | KATP   | 1.33     | mM                                                     | [5]  |
| <b>cmdk1/ cmdk2</b> | Nucleoside diphosphate kinase 1(Cytosolic) / Nucleoside diphosphate kinase 2(Cytosolic) | KiATP  | 1.33     | mM                                                     |      |
| <b>cmdk1/ cmdk2</b> | Nucleoside diphosphate kinase 1(Cytosolic) / Nucleoside diphosphate kinase 2(Cytosolic) | KGDP   | 0.031    | mM                                                     | [5]  |
| <b>cmdk1/ cmdk2</b> | Nucleoside diphosphate kinase 1(Cytosolic) / Nucleoside diphosphate kinase 2(Cytosolic) | KADP   | 0.042    | mM                                                     | [5]  |

|                   |                                                                                         |        |        |                                                            |      |
|-------------------|-----------------------------------------------------------------------------------------|--------|--------|------------------------------------------------------------|------|
| <b>cdk1/ cdk2</b> | Nucleoside diphosphate kinase 1(Cytosolic) / Nucleoside diphosphate kinase 2(Cytosolic) | KiADP  | 0.042  | mM                                                         |      |
| <b>cdk1</b>       | Nucleoside diphosphate kinase 1(Cytosolic)                                              | KGTP   | 0.15   | mM                                                         | [5]  |
| <b>cdk1</b>       | Nucleoside diphosphate kinase 1(Cytosolic)                                              | KiGTP  | 0.15   | mM                                                         |      |
| <b>cdk1/ cdk2</b> | Nucleoside diphosphate kinase 1(Cytosolic) / Nucleoside diphosphate kinase 2(Cytosolic) | KUDP   | 0.19   | mM                                                         | [5]  |
| <b>cdk2</b>       | Nucleoside diphosphate kinase 2(Cytosolic)                                              | KiUDP  | 0.19   | mM                                                         | [5]  |
| <b>cdk2</b>       | Nucleoside diphosphate kinase 2(Cytosolic)                                              | KUTP   | 16     | mM                                                         | [5]  |
| <b>cdk2</b>       | Nucleoside diphosphate kinase 2(Cytosolic)                                              | KiUTP  | 16     | mM                                                         |      |
| <b>coqhoxi</b>    | Ubiquinol Oxidase                                                                       | k      | Fitted | $1^5 \cdot \text{mmol}^{-1} \cdot \text{cell}^{-1}$        |      |
| <b>cs</b>         | Citrate synthase                                                                        | V      | Fitted | $\text{pmol} \cdot \text{min}^{-1} \cdot \text{cell}^{-1}$ |      |
| <b>cs</b>         | Citrate synthase                                                                        | KiACoA | 0.005  | mM                                                         | [12] |
| <b>cs</b>         | Citrate synthase                                                                        | KOAA   | 0.0059 | mM                                                         | [12] |
| <b>cs</b>         | Citrate synthase                                                                        | KiOAA  | 0.0059 | mM                                                         |      |
| <b>cs</b>         | Citrate synthase                                                                        | KiCit  | 2      | mM                                                         |      |
| <b>dic</b>        | Dicarboxylate Carrier                                                                   | V      | Fitted | $\text{pmol} \cdot \text{min}^{-1} \cdot \text{cell}^{-1}$ |      |
| <b>dic</b>        | Dicarboxylate Carrier                                                                   | Keq    | 1      | –                                                          |      |
| <b>dic</b>        | Dicarboxylate Carrier                                                                   | KimMal | 0.92   | mM                                                         | [7]  |
| <b>dic</b>        | Dicarboxylate Carrier                                                                   | KcPi   | 1.41   | mM                                                         | [7]  |
| <b>dic</b>        | Dicarboxylate Carrier                                                                   | KicPi  | 1.41   | mM                                                         |      |
| <b>dic</b>        | Dicarboxylate Carrier                                                                   | KmPi   | 0.93   | mM                                                         | [7]  |
| <b>dic</b>        | Dicarboxylate Carrier                                                                   | KimPi  | 0.93   | mM                                                         |      |
| <b>dic</b>        | Dicarboxylate Carrier                                                                   | KicMal | 0.49   | mM                                                         | [7]  |
| <b>eno</b>        | Enolase                                                                                 | V      | 2      | $\text{pmol} \cdot \text{min}^{-1} \cdot \text{cell}^{-1}$ |      |
| <b>eno</b>        | Enolase                                                                                 | Keq    | 4      | –                                                          | [1]  |

|                         |                                                                             |               |        |                                            |      |
|-------------------------|-----------------------------------------------------------------------------|---------------|--------|--------------------------------------------|------|
| <b>eno</b>              | Enolase                                                                     | KPG2          | 0.14   | mM                                         | [13] |
| <b>eno</b>              | Enolase                                                                     | KPEP          | 0.31   | mM                                         | [13] |
| <b>fasyn</b>            | Fatty acid synthesis                                                        | V             | Fitted | pmol·min <sup>-1</sup> ·cell <sup>-1</sup> |      |
| <b>fasyn</b>            | Fatty acid synthesis                                                        | KMalCoA       | 0.0019 | mM                                         | [14] |
| <b>fasyn</b>            | Fatty acid synthesis                                                        | KACoA         | 0.0039 | mM                                         | [14] |
| <b>fasyn</b>            | Fatty acid synthesis                                                        | KNADPH        | 0.01   | mM                                         |      |
| <b>fbasea1</b>          | Fructose 1,6-bisphosphatase (Pool A)                                        | V             | Fitted | pmol·min <sup>-1</sup> ·cell <sup>-1</sup> |      |
| <b>fbasea1/ fbaseb1</b> | Fructose 1,6-bisphosphatase (Pool A) / Fructose 1,6-bisphosphatase (Pool B) | KFru16bp      | 0.0055 | mM                                         | [15] |
| <b>fbasea1/ fbaseb1</b> | Fructose 1,6-bisphosphatase (Pool A) / Fructose 1,6-bisphosphatase (Pool B) | kAMP          | 0.24   | mM                                         | [15] |
| <b>fbasea1/ fbaseb1</b> | Fructose 1,6-bisphosphatase (Pool A) / Fructose 1,6-bisphosphatase (Pool B) | nAMP          | 1      | –                                          |      |
| <b>fbasea1/ fbaseb1</b> | Fructose 1,6-bisphosphatase (Pool A) / Fructose 1,6-bisphosphatase (Pool B) | KiFru26bp     | 0.001  | mM                                         | [5]  |
| <b>fbasea2/ pfkla2</b>  | Fructose 1,6-bisphosphatase (Pool A) / Phosphofructokinase-2 (Pool A)       | V             | 0.0001 | pmol·min <sup>-1</sup> ·cell <sup>-1</sup> |      |
| <b>fbasea2/ fbaseb2</b> | Fructose 2,6-bisphosphatase (Pool A) / Fructose 2,6-bisphosphatase (Pool B) | Pfk2Fb2Factor | 0.4    | –                                          | [16] |
| <b>fbasea2/ fbaseb2</b> | Fructose 2,6-bisphosphatase (Pool A) / Fructose 2,6-bisphosphatase (Pool B) | p             | 0.7    | –                                          | [5]  |
| <b>fbasea2/ fbaseb2</b> | Fructose 2,6-bisphosphatase (Pool A) / Fructose 2,6-bisphosphatase (Pool B) | KdpFru26bP    | 0.01   | mM                                         | [5]  |
| <b>fbasea2/ fbaseb2</b> | Fructose 2,6-bisphosphatase (Pool A) / Fructose 2,6-bisphosphatase (Pool B) | KpFru26bP     | 0.005  | mM                                         | [5]  |
| <b>fbasea2/ fbaseb2</b> | Fructose 2,6-bisphosphatase (Pool A) / Fructose 2,6-bisphosphatase (Pool B) | KidpFru6P     | 0.0035 | mM                                         | [5]  |

|                         |                                                                             |          |        |                                            |      |
|-------------------------|-----------------------------------------------------------------------------|----------|--------|--------------------------------------------|------|
| <b>fbasea2/ fbaseb2</b> | Fructose 2,6-bisphosphatase (Pool A) / Fructose 2,6-bisphosphatase (Pool B) | KipFru6p | 0.05   | mM                                         | [5]  |
| <b>fbaseb1</b>          | Fructose 1,6-bisphosphatase (Pool B)                                        | V        | Fitted | pmol·min <sup>-1</sup> ·cell <sup>-1</sup> |      |
| <b>fbaseb2/ pfklb2</b>  | Fructose 1,6-bisphosphatase (Pool B) / Phosphofructokinase-2 (Pool B)       | V        | 0.0001 | pmol·min <sup>-1</sup> ·cell <sup>-1</sup> |      |
| <b>fh</b>               | Fumarate Hydratase                                                          | V        | Fitted | pmol·min <sup>-1</sup> ·cell <sup>-1</sup> |      |
| <b>fh</b>               | Fumarate Hydratase                                                          | Keq      | 12     | –                                          | [1]  |
| <b>fh</b>               | Fumarate Hydratase                                                          | KFum     | 0.005  | mM                                         | [17] |
| <b>fh</b>               | Fumarate Hydratase                                                          | KMal     | 0.025  | mM                                         | [17] |
| <b>fruhk</b>            | Fructokinase                                                                | V        | Fitted | pmol·min <sup>-1</sup> ·cell <sup>-1</sup> |      |
| <b>fruhk</b>            | Fructokinase                                                                | KiATP    | 0.15   | mM                                         | [18] |
| <b>fruhk</b>            | Fructokinase                                                                | KFru     | 0.8    | mM                                         | [18] |
| <b>fruhk</b>            | Fructokinase                                                                | KiFru    | 0.8    | mM                                         |      |
| <b>frutransport</b>     | Fructose carrier                                                            | V        | Fitted | pmol·min <sup>-1</sup> ·cell <sup>-1</sup> |      |
| <b>frutransport</b>     | Fructose carrier                                                            | Keq      | 1      | –                                          |      |
| <b>frutr</b>            | Fructose carrier                                                            | KFru     | 67     | mM                                         | [19] |
| <b>g6pasea</b>          | Glucose-6-Phosphatase (Pool A)                                              | V        | Fitted | pmol·min <sup>-1</sup> ·cell <sup>-1</sup> |      |
| <b>g6pasea/ g6paseb</b> | Glucose-6-Phosphatase (Pool A) / Fructose 1,6-bisphosphatase (Pool B)       | KGlc6P   | 2      | mM                                         | [5]  |
| <b>g6paseb</b>          | Glucose-6-Phosphatase (Pool B)                                              | V        | Fitted | pmol·min <sup>-1</sup> ·cell <sup>-1</sup> |      |
| <b>g6pdh</b>            | Glucose-6-Phosphate deshydrogenase                                          | V        | Fitted | pmol·min <sup>-1</sup> ·cell <sup>-1</sup> |      |
| <b>g6pdh</b>            | Glucose-6-Phosphate deshydrogenase                                          | KNADP    | 0.0048 | mM                                         | [20] |
| <b>g6pdh</b>            | Glucose-6-Phosphate deshydrogenase                                          | KiNADP   | 0.009  | mM                                         | [20] |



|                 |                                             |            |         |                                            |      |
|-----------------|---------------------------------------------|------------|---------|--------------------------------------------|------|
| <b>g6pdh</b>    | Glucose-6-Phosphate deshydrogenase          | KGlc6P     | 0.036   | mM                                         | [20] |
| <b>g6pdh</b>    | Glucose-6-Phosphate deshydrogenase          | KiGlc6P    | 0.036   | mM                                         |      |
| <b>g6pdh</b>    | Glucose-6-Phosphate deshydrogenase          | KNADPH     | 0.0011  | mM                                         |      |
| <b>g6pdh</b>    | Glucose-6-Phosphate deshydrogenase          | KiNADPH    | 0.0011  | mM                                         | [20] |
| <b>g6pdh</b>    | Glucose-6-Phosphate deshydrogenase          | KPGn       | 0.01    | mM                                         |      |
| <b>g6pdh</b>    | Glucose-6-Phosphate deshydrogenase          | KiPGn      | 0.01    | mM                                         |      |
| <b>gapdh</b>    | Glyceraldehyde 3-phosphate dehydrogenase    | V          | 2       | pmol·min <sup>-1</sup> ·cell <sup>-1</sup> |      |
| <b>gapdh</b>    | Glyceraldehyde 3-phosphate dehydrogenase    | Keq        | 0.00015 | _                                          | [1]  |
| <b>gapdh</b>    | Glyceraldehyde 3-phosphate dehydrogenase    | Kgrap      | 0.07    | mM                                         | [21] |
| <b>gapdh</b>    | Glyceraldehyde 3-phosphate dehydrogenase    | Knad       | 0.05    | mM                                         | [21] |
| <b>gapdh</b>    | Glyceraldehyde 3-phosphate dehydrogenase    | Kpi        | 3.9     | mM                                         | [5]  |
| <b>gapdh</b>    | Glyceraldehyde 3-phosphate dehydrogenase    | Knadh      | 0.01    | mM                                         | [21] |
| <b>gapdh</b>    | Glyceraldehyde 3-phosphate dehydrogenase    | Kbpg13     | 0.14    | mM                                         | [21] |
| <b>gka</b>      | Glucokinase (Pool A)                        | V          | Fitted  | pmol·min <sup>-1</sup> ·cell <sup>-1</sup> |      |
| <b>gka/ gkb</b> | Glucokinase (Pool A) / Glucokinase (Pool B) | nGlc       | 1.58    | _                                          | [22] |
| <b>gka/ gkb</b> | Glucokinase (Pool A) / Glucokinase (Pool B) | Kglc       | 9       | mM                                         | [22] |
| <b>gka/ gkb</b> | Glucokinase (Pool A) / Glucokinase (Pool B) | Katp       | 0.26    | mM                                         | [23] |
| <b>gka/ gkb</b> | Glucokinase (Pool A) / Glucokinase (Pool B) | ngkrp      | 2       | _                                          | [5]  |
| <b>gka/ gkb</b> | Glucokinase (Pool A) / Glucokinase (Pool B) | bgkrp      | 0.7     | _                                          | [5]  |
| <b>gka/ gkb</b> | Glucokinase (Pool A) / Glucokinase (Pool B) | KgkrpFru6p | 0.01    | mM                                         | [5]  |
| <b>gka/ gkb</b> | Glucokinase (Pool A) / Glucokinase (Pool B) | KFru1P     | 0.001   | mM                                         | [24] |
| <b>gka/ gkb</b> | Glucokinase (Pool A) / Glucokinase (Pool B) | KgkrpGlc   | 15      | mM                                         | [5]  |
| <b>gkb</b>      | Glucokinase (Pool B)                        | V          | Fitted  | pmol·min <sup>-1</sup> ·cell <sup>-1</sup> |      |
| <b>glctr</b>    | Glucose carrier                             | V          | 2       | pmol·min <sup>-1</sup> ·cell <sup>-1</sup> |      |
| <b>glctr</b>    | Glucose carrier                             | kGlc       | 17      | mM                                         | [25] |

|                  |                                                 |          |          |                                            |      |
|------------------|-------------------------------------------------|----------|----------|--------------------------------------------|------|
| <b>glctr</b>     | Glucose carrier                                 | Keq      | 1        | mM                                         |      |
| <b>glutr</b>     | Glutamate carrier                               | V        | Fitted   | pmol·min <sup>-1</sup> ·cell <sup>-1</sup> |      |
| <b>glutr</b>     | Glutamate carrier                               | KGlu     | 2        | mM                                         |      |
| <b>glutr</b>     | Glutamate carrier                               | Keq      | 10       | –                                          |      |
| <b>glyc3pcdh</b> | Glycerol-3-phosphate dehydrogenase (NAD)        | V        | Fitted   | pmol·min <sup>-1</sup> ·cell <sup>-1</sup> |      |
| <b>glyc3pcdh</b> | Glycerol-3-phosphate dehydrogenase (NAD)        | Keq      | 0.000056 | –                                          | [26] |
| <b>glyc3pcdh</b> | Glycerol-3-phosphate dehydrogenase (NAD)        | kNAD     | 0.13     | mM                                         | [27] |
| <b>glyc3pcdh</b> | Glycerol-3-phosphate dehydrogenase (NAD)        | kiNAD    | 0.13     | mM                                         |      |
| <b>glyc3pcdh</b> | Glycerol-3-phosphate dehydrogenase (NAD)        | KGlyc3P  | 0.22     | mM                                         | [27] |
| <b>glyc3pcdh</b> | Glycerol-3-phosphate dehydrogenase (NAD)        | KiGlyc3P | 0.22     | mM                                         |      |
| <b>glyc3pcdh</b> | Glycerol-3-phosphate dehydrogenase (NAD)        | KDhaP    | 0.16     | mM                                         | [27] |
| <b>glyc3pcdh</b> | Glycerol-3-phosphate dehydrogenase (NAD)        | KiDhaP   | 0.16     | mM                                         |      |
| <b>glyc3pcdh</b> | Glycerol-3-phosphate dehydrogenase (NAD)        | kNADH    | 0.08     | mM                                         | [27] |
| <b>glyc3pcdh</b> | Glycerol-3-phosphate dehydrogenase (NAD)        | kiNADH   | 0.08     | mM                                         |      |
| <b>glyc3pmdh</b> | Glycerol-3-phosphate dehydrogenase (Ubiquinone) | V        | Fitted   | pmol·min <sup>-1</sup> ·cell <sup>-1</sup> |      |
| <b>glyc3pmdh</b> | Glycerol-3-phosphate dehydrogenase (Ubiquinone) | KGlyc3P  | 6.2      | mM                                         | [28] |
| <b>glyc3pmdh</b> | Glycerol-3-phosphate dehydrogenase (Ubiquinone) | KiGlyc3P | 6.2      | mM                                         |      |
| <b>glyc3pmdh</b> | Glycerol-3-phosphate dehydrogenase (Ubiquinone) | KCoQ     | 0.05     | mM                                         | [28] |
| <b>gp</b>        | Glycerol-3-phosphate dehydrogenase (Ubiquinone) | V        | Fitted   | pmol·min <sup>-1</sup> ·cell <sup>-1</sup> |      |
| <b>gp</b>        | Glycerol-3-phosphate dehydrogenase (Ubiquinone) | p        | 0.7      | –                                          | [5]  |
| <b>gp</b>        | Glycerol-3-phosphate dehydrogenase (Ubiquinone) | KDPGlyc  | 0.048    | mM                                         | [5]  |
| <b>gp</b>        | Glycerol-3-phosphate dehydrogenase (Ubiquinone) | KPGlyc   | 0.027    | mM                                         | [5]  |
| <b>gp</b>        | Glycerol-3-phosphate dehydrogenase (Ubiquinone) | KDPPi    | 300      | mM                                         | [5]  |
| <b>gp</b>        | Glycerol-3-phosphate dehydrogenase (Ubiquinone) | KPPi     | 5        | mM                                         | [5]  |
| <b>gp</b>        | Glycerol-3-phosphate dehydrogenase (Ubiquinone) | KGlcPi   | 5        | mM                                         | [5]  |

|                   |                                                                                 |            |         |                                            |      |
|-------------------|---------------------------------------------------------------------------------|------------|---------|--------------------------------------------|------|
| <b>gp</b>         | Glycerol-3-phosphate dehydrogenase (Ubiquinone)                                 | KDPAMPbase | 0.03    | mM                                         | [5]  |
| <b>gp</b>         | Glycerol-3-phosphate dehydrogenase (Ubiquinone)                                 | KDPAMPmax  | 0.3     | mM                                         | [5]  |
| <b>gp</b>         | Glycerol-3-phosphate dehydrogenase (Ubiquinone)                                 | KDPAMPa    | 1       | mM                                         | [5]  |
| <b>gpia</b>       | Glucose-6-Phosphate-Isomerase (Pool A)                                          | V          | 2       | pmol·min <sup>-1</sup> ·cell <sup>-1</sup> |      |
| <b>gpia/ gpib</b> | Glucose-6-Phosphate-Isomerase (Pool A) / Glucose-6-Phosphate-Isomerase (Pool B) | Keq        | 0.4     | –                                          | [1]  |
| <b>gpia/ gpib</b> | Glucose-6-Phosphate-Isomerase (Pool A) / Glucose-6-Phosphate-Isomerase (Pool B) | kGlc6p     | 0.445   | mM                                         | [29] |
| <b>gpia/ gpib</b> | Glucose-6-Phosphate-Isomerase (Pool A) / Glucose-6-Phosphate-Isomerase (Pool B) | kFru6P     | 0.0635  | mM                                         | [29] |
| <b>gpib</b>       | Glucose-6-Phosphate-Isomerase (Pool B)                                          | V          | 2       | pmol·min <sup>-1</sup> ·cell <sup>-1</sup> |      |
| <b>gs</b>         | Glycogen synthase                                                               | V          | Fitted  | pmol·min <sup>-1</sup> ·cell <sup>-1</sup> |      |
| <b>gs</b>         | Glycogen synthase                                                               | p          | 0.7     | –                                          | [5]  |
| <b>gs</b>         | Glycogen synthase                                                               | K1dp       | 0.224   | mM                                         | [5]  |
| <b>gs</b>         | Glycogen synthase                                                               | K1p        | 3.003   | mM                                         | [5]  |
| <b>gs</b>         | Glycogen synthase                                                               | K2dp       | 0.1504  | mM                                         | [5]  |
| <b>gs</b>         | Glycogen synthase                                                               | K2p        | 0.09029 | mM                                         | [5]  |
| <b>idh</b>        | Isocitrate dehydrogenase                                                        | V          | Fitted  | pmol·min <sup>-1</sup> ·cell <sup>-1</sup> |      |
| <b>idh</b>        | Isocitrate dehydrogenase                                                        | Keq        | 1200    | mM                                         | [1]  |
| <b>idh</b>        | Isocitrate dehydrogenase                                                        | KiCit      | 0.69    | mM                                         | [30] |
| <b>idh</b>        | Isocitrate dehydrogenase                                                        | KNAD       | 0.08    | mM                                         | [30] |
| <b>idh</b>        | Isocitrate dehydrogenase                                                        | KKg        | 0.69    | mM                                         |      |
| <b>idh</b>        | Isocitrate dehydrogenase                                                        | KNADH      | 0.08    | mM                                         |      |
| <b>idh</b>        | Isocitrate dehydrogenase                                                        | KCO2       | 2       | mM                                         |      |
| <b>kdh</b>        | α-Ketoglutarate dehydrogenase                                                   | V          | Fitted  | pmol·min <sup>-1</sup> ·cell <sup>-1</sup> |      |

|                     |                                                  |        |         |                                                        |      |
|---------------------|--------------------------------------------------|--------|---------|--------------------------------------------------------|------|
| <b>kdh</b>          | $\alpha$ -Ketoglutarate dehydrogenase            | Keq    | 60000   | _                                                      | [1]  |
| <b>kdh</b>          | $\alpha$ -Ketoglutarate dehydrogenase            | KKg    | 0.3     | mM                                                     | [31] |
| <b>kdh</b>          | $\alpha$ -Ketoglutarate dehydrogenase            | KNAD   | 0.22    | mM                                                     | [32] |
| <b>kdh</b>          | $\alpha$ -Ketoglutarate dehydrogenase            | KCoA   | 0.01    | mM                                                     |      |
| <b>kdh</b>          | $\alpha$ -Ketoglutarate dehydrogenase            | KSuCoA | 0.03    | mM                                                     | [33] |
| <b>kdh</b>          | $\alpha$ -Ketoglutarate dehydrogenase            | KNADH  | 0.07    | mM                                                     |      |
| <b>kdh</b>          | $\alpha$ -Ketoglutarate dehydrogenase            | KCO2   | 2       | mM                                                     |      |
| <b>lactr/ pyrtr</b> | Lactate carrier / Pyruvate extracellular carrier | V      | Fitted  | $\text{pmol}\cdot\text{min}^{-1}\cdot\text{cell}^{-1}$ |      |
| <b>lactr/ pyrtr</b> | Lactate carrier / Pyruvate extracellular carrier | Keq    | 1       | _                                                      |      |
| <b>lactr/ pyrtr</b> | Lactate carrier / Pyruvate extracellular carrier | KLac   | 2.4     | mM                                                     | [34] |
| <b>lactr/ pyrtr</b> | Lactate carrier / Pyruvate extracellular carrier | KPyr   | 0.6     | mM                                                     | [34] |
| <b>ldh</b>          | Lactate dehydrogenase                            | V      | Fitted  | $\text{pmol}\cdot\text{min}^{-1}\cdot\text{cell}^{-1}$ |      |
| <b>ldh</b>          | Lactate dehydrogenase                            | Keq    | 0.00011 | _                                                      |      |
| <b>ldh</b>          | Lactate dehydrogenase                            | KNAD   | 1.1     | mM                                                     | [35] |
| <b>ldh</b>          | Lactate dehydrogenase                            | KiNAD  | 1.1     | mM                                                     |      |
| <b>ldh</b>          | Lactate dehydrogenase                            | KLac   | 11.9    | mM                                                     | [36] |
| <b>ldh</b>          | Lactate dehydrogenase                            | KiLac  | 11.9    | mM                                                     |      |
| <b>ldh</b>          | Lactate dehydrogenase                            | KPyr   | 0.398   | mM                                                     | [37] |
| <b>ldh</b>          | Lactate dehydrogenase                            | KiPyr  | 0.398   | mM                                                     |      |
| <b>ldh</b>          | Lactate dehydrogenase                            | KNADH  | 0.061   | mM                                                     | [35] |
| <b>ldh</b>          | Lactate dehydrogenase                            | KiNADH | 0.061   | mM                                                     |      |
| <b>malic</b>        | Malic enzyme                                     | V      | Fitted  | $\text{pmol}\cdot\text{min}^{-1}\cdot\text{cell}^{-1}$ |      |
| <b>malic</b>        | Malic enzyme                                     | Keq    | 6       | _                                                      | [1]  |
| <b>malic</b>        | Malic enzyme                                     | KMal   | 0.12    | mM                                                     | [38] |
| <b>malic</b>        | Malic enzyme                                     | kNADP  | 0.0092  | mM                                                     | [38] |

|                    |                                               |        |          |                                            |      |
|--------------------|-----------------------------------------------|--------|----------|--------------------------------------------|------|
| <b>malic</b>       | Malic enzyme                                  | KPyr   | 5.9      | mM                                         | [38] |
| <b>malic</b>       | Malic enzyme                                  | kNADPH | 0.0053   | mM                                         | [38] |
| <b>malic</b>       | Malic enzyme                                  | KCO2   | 27       | mM                                         | [38] |
| <b>malkgmtrans</b> | $\alpha$ -Ketoglutarate/Malate carrier        | V      | Fitted   | pmol·min <sup>-1</sup> ·cell <sup>-1</sup> |      |
| <b>malkgmtrans</b> | $\alpha$ -Ketoglutarate/Malate carrier        | Keq    | 1        | –                                          |      |
| <b>malkgmtrans</b> | $\alpha$ -Ketoglutarate/Malate carrier        | KimKg  | 0.17     | mM                                         | [7]  |
| <b>malkgmtrans</b> | $\alpha$ -Ketoglutarate/Malate carrier        | KcMal  | 1.36     | mM                                         | [7]  |
| <b>malkgmtrans</b> | $\alpha$ -Ketoglutarate/Malate carrier        | KicMal | 1.36     | mM                                         | [7]  |
| <b>malkgmtrans</b> | $\alpha$ -Ketoglutarate/Malate carrier        | KmMal  | 0.71     | mM                                         | [7]  |
| <b>malkgmtrans</b> | $\alpha$ -Ketoglutarate/Malate carrier        | KimMal | 0.71     | mM                                         | [7]  |
| <b>malkgmtrans</b> | $\alpha$ -Ketoglutarate/Malate carrier        | KicKg  | 0.31     | mM                                         | [7]  |
| <b>mmdh</b>        | Malate dehydrogenase (Mitochondrial)          | V      | Fitted   | pmol·min <sup>-1</sup> ·cell <sup>-1</sup> |      |
| <b>mmdh</b>        | Malate dehydrogenase (Mitochondrial)          | Keq    | 0.000028 | –                                          | [1]  |
| <b>mmdh</b>        | Malate dehydrogenase (Mitochondrial)          | kNAD   | 0.35     | mM                                         | [39] |
| <b>mmdh</b>        | Malate dehydrogenase (Mitochondrial)          | kiNAD  | 0.35     | mM                                         |      |
| <b>mmdh</b>        | Malate dehydrogenase (Mitochondrial)          | kMal   | 3.53     | mM                                         | [39] |
| <b>mmdh</b>        | Malate dehydrogenase (Mitochondrial)          | kiMal  | 3.53     | mM                                         |      |
| <b>mmdh</b>        | Malate dehydrogenase (Mitochondrial)          | kOAA   | 0.0348   | mM                                         | [11] |
| <b>mmdh</b>        | Malate dehydrogenase (Mitochondrial)          | kiOAA  | 0.0348   | mM                                         |      |
| <b>mmdh</b>        | Malate dehydrogenase (Mitochondrial)          | kNADH  | 0.0145   | mM                                         | [11] |
| <b>mmdh</b>        | Malate dehydrogenase (Mitochondrial)          | kiNADH | 0.0145   | mM                                         |      |
| <b>mndk</b>        | Nucleoside diphosphate kinase (Mitochondrial) | V      | 2        | pmol·min <sup>-1</sup> ·cell <sup>-1</sup> |      |
| <b>mndk</b>        | Nucleoside diphosphate kinase (Mitochondrial) | Keq    | 1        | –                                          | [1]  |
| <b>mndk</b>        | Nucleoside diphosphate kinase (Mitochondrial) | KATP   | 1.33     | mM                                         | [5]  |
| <b>mndk</b>        | Nucleoside diphosphate kinase (Mitochondrial) | KiATP  | 1.33     | mM                                         |      |
| <b>mndk</b>        | Nucleoside diphosphate kinase (Mitochondrial) | KGDP   | 0.031    | mM                                         | [5]  |

|               |                                               |        |        |                                            |      |
|---------------|-----------------------------------------------|--------|--------|--------------------------------------------|------|
| <b>mndk</b>   | Nucleoside diphosphate kinase (Mitochondrial) | KADP   | 0.042  | mM                                         | [5]  |
| <b>mndk</b>   | Nucleoside diphosphate kinase (Mitochondrial) | KiADP  | 0.042  | mM                                         |      |
| <b>mndk</b>   | Nucleoside diphosphate kinase (Mitochondrial) | KGTP   | 0.15   | mM                                         | [5]  |
| <b>mndk</b>   | Nucleoside diphosphate kinase (Mitochondrial) | KiGTP  | 0.15   | mM                                         |      |
| <b>mpyrtr</b> | Mitochondrial pyruvate carrier                | V      | 2      | pmol·min <sup>-1</sup> ·cell <sup>-1</sup> |      |
| <b>mpyrtr</b> | Mitochondrial pyruvate carrier                | Keq    | 1      | –                                          |      |
| <b>mpyrtr</b> | Mitochondrial pyruvate carrier                | KPyr   | 0.24   | mM                                         | [7]  |
| <b>mpyrtr</b> | Mitochondrial pyruvate carrier                | KiMal  | 10     | mM                                         |      |
| <b>nadhhd</b> | NADH dehydrogenase                            | k      | Fitted |                                            |      |
| <b>pc</b>     | Pyruvate Carboxylase                          | V      | Fitted | pmol·min <sup>-1</sup> ·cell <sup>-1</sup> |      |
| <b>pc</b>     | Pyruvate Carboxylase                          | Keq    | 180    | –                                          | [1]  |
| <b>pc</b>     | Pyruvate Carboxylase                          | KPyr   | 0.22   | mM                                         | [40] |
| <b>pc</b>     | Pyruvate Carboxylase                          | KATP   | 0.22   | mM                                         | [40] |
| <b>pc</b>     | Pyruvate Carboxylase                          | KCO2   | 3.2    | mM                                         | [40] |
| <b>pc</b>     | Pyruvate Carboxylase                          | KOAA   | 0.002  | mM                                         |      |
| <b>pc</b>     | Pyruvate Carboxylase                          | kADP   | 0.22   | mM                                         |      |
| <b>pc</b>     | Pyruvate Carboxylase                          | KPi    | 3.2    | mM                                         |      |
| <b>pc</b>     | Pyruvate Carboxylase                          | KACoA  | 0.022  | mM                                         | [41] |
| <b>pc</b>     | Pyruvate Carboxylase                          | beta   | 50     | –                                          | [42] |
| <b>pdh</b>    | Pyruvate dehydrogenase                        | V      | Fitted | pmol·min <sup>-1</sup> ·cell <sup>-1</sup> |      |
| <b>pdh</b>    | Pyruvate dehydrogenase                        | p      | 0.7    | –                                          | [5]  |
| <b>pdh</b>    | Pyruvate dehydrogenase                        | KPyr   | 0.025  | mM                                         | [5]  |
| <b>pdh</b>    | Pyruvate dehydrogenase                        | KCoA   | 0.013  | mM                                         | [5]  |
| <b>pdh</b>    | Pyruvate dehydrogenase                        | KNAD   | 0.05   | mM                                         | [5]  |
| <b>pdh</b>    | Pyruvate dehydrogenase                        | KiACoA | 0.035  | mM                                         | [5]  |
| <b>pdh</b>    | Pyruvate dehydrogenase                        | KiNADH | 0.036  | mM                                         | [5]  |

|                       |                                                               |          |        |                                            |      |
|-----------------------|---------------------------------------------------------------|----------|--------|--------------------------------------------|------|
| <b>pdh</b>            | Pyruvate dehydrogenase                                        | alfaDP   | 5      | _                                          | [5]  |
| <b>pdh</b>            | Pyruvate dehydrogenase                                        | alfaP    | 1      | _                                          | [5]  |
| <b>pepck</b>          | Phosphoenolpyruvate carboxykinase                             | V        | Fitted | pmol·min <sup>-1</sup> ·cell <sup>-1</sup> |      |
| <b>pepck</b>          | Phosphoenolpyruvate carboxykinase                             | Keq      | 300    | mM                                         | [1]  |
| <b>pepck</b>          | Phosphoenolpyruvate carboxykinase                             | KGTP     | 0.068  | mM                                         | [43] |
| <b>pepck</b>          | Phosphoenolpyruvate carboxykinase                             | KOAA     | 0.052  | mM                                         | [43] |
| <b>pepck</b>          | Phosphoenolpyruvate carboxykinase                             | KPEP     | 0.294  | mM                                         | [43] |
| <b>pepck</b>          | Phosphoenolpyruvate carboxykinase                             | KGDP     | 0.039  | mM                                         | [43] |
| <b>pepck</b>          | Phosphoenolpyruvate carboxykinase                             | KCO2     | 1.194  | mM                                         | [43] |
| <b>pfkla1</b>         | Phosphofructokinase 1(Pool A)                                 | V        | Fitted | pmol·min <sup>-1</sup> ·cell <sup>-1</sup> |      |
| <b>pfkla1/ pfklb1</b> | Phosphofructokinase 1(Pool A) / Phosphofructokinase 1(Pool B) | KATP     | 0.111  | mM                                         | [5]  |
| <b>pfkla1/ pfklb1</b> | Phosphofructokinase 1(Pool A) / Phosphofructokinase 1(Pool B) | KFru6P   | 0.077  | mM                                         | [5]  |
| <b>pfkla1/ pfklb1</b> | Phosphofructokinase 1(Pool A) / Phosphofructokinase 1(Pool B) | KiFru6P  | 0.077  | mM                                         | [5]  |
| <b>pfkla1/ pfklb1</b> | Phosphofructokinase 1(Pool A) / Phosphofructokinase 1(Pool B) | KFru26bP | 0.001  | mM                                         | [5]  |
| <b>pfkla2/ pfklb2</b> | Phosphofructokinase 2(Pool A) / Phosphofructokinase 2(Pool B) | p        | 0.7    | _                                          | [5]  |
| <b>pfkla2/ pfklb2</b> | Phosphofructokinase 2(Pool A) / Phosphofructokinase 2(Pool B) | ndp      | 1.3    | _                                          | [5]  |
| <b>pfkla2/ pfklb2</b> | Phosphofructokinase 2(Pool A) / Phosphofructokinase 2(Pool B) | np       | 2.1    | _                                          | [5]  |
| <b>pfkla2/ pfklb2</b> | Phosphofructokinase 2(Pool A) / Phosphofructokinase 2(Pool B) | KdpATP   | 0.28   | mM                                         | [5]  |
| <b>pfkla2/ pfklb2</b> | Phosphofructokinase 2(Pool A) / Phosphofructokinase 2(Pool B) | KpATP    | 0.65   | mM                                         | [5]  |

|                       |                                                               |          |        |                                                        |      |
|-----------------------|---------------------------------------------------------------|----------|--------|--------------------------------------------------------|------|
| <b>pfkla2/ pfklb2</b> | Phosphofructokinase 2(Pool A) / Phosphofructokinase 2(Pool B) | KdpFru6P | 0.016  | mM                                                     | [5]  |
| <b>pfkla2/ pfklb2</b> | Phosphofructokinase 2(Pool A) / Phosphofructokinase 2(Pool B) | KpFru6P  | 0.05   | mM                                                     | [5]  |
| <b>pfkla2/ pfklb2</b> | Phosphofructokinase 2(Pool A) / Phosphofructokinase 2(Pool B) | KiCit    | 0.2    | mM                                                     | [44] |
| <b>pfkla2/ pfklb2</b> | Phosphofructokinase 2(Pool A) / Phosphofructokinase 2(Pool B) | KiPEP    | 0.2    | mM                                                     | [44] |
| <b>pfklb1</b>         | Phosphofructokinase 1(Pool B)                                 | V        | Fitted | $\text{pmol}\cdot\text{min}^{-1}\cdot\text{cell}^{-1}$ |      |
| <b>pgk</b>            | Phosphoglycerate kinase                                       | V        | 6      | $\text{pmol}\cdot\text{min}^{-1}\cdot\text{cell}^{-1}$ |      |
| <b>pgk</b>            | Phosphoglycerate kinase                                       | Keq      | 3200   | _                                                      | [1]  |
| <b>pgk</b>            | Phosphoglycerate kinase                                       | KibPG13  | 0.0005 | mM                                                     | [45] |
| <b>pgk</b>            | Phosphoglycerate kinase                                       | KADP     | 0.11   | mM                                                     | [45] |
| <b>pgk</b>            | Phosphoglycerate kinase                                       | KiADP    | 0.11   | mM                                                     |      |
| <b>pgk</b>            | Phosphoglycerate kinase                                       | KATP     | 0.12   | mM                                                     | [45] |
| <b>pgk</b>            | Phosphoglycerate kinase                                       | KiATP    | 0.12   | mM                                                     |      |
| <b>pgk</b>            | Phosphoglycerate kinase                                       | KiPG3    | 0.05   | mM                                                     | [45] |
| <b>pglm</b>           | Phosphoglucomutase                                            | V        | 0.15   | $\text{pmol}\cdot\text{min}^{-1}\cdot\text{cell}^{-1}$ |      |
| <b>pglm</b>           | Phosphoglucomutase                                            | Keq      | 19     | _                                                      | [1]  |
| <b>pglm</b>           | Phosphoglucomutase                                            | KGlc1P   | 0.045  | mM                                                     | [5]  |
| <b>pglm</b>           | Phosphoglucomutase                                            | KGlc6Pb  | 0.67   | mM                                                     | [5]  |
| <b>pgm</b>            | Phosphoglycerate mutase                                       | V        | 2      | $\text{pmol}\cdot\text{min}^{-1}\cdot\text{cell}^{-1}$ |      |
| <b>pgm</b>            | Phosphoglycerate mutase                                       | Keq      | 0.125  | _                                                      | [1]  |
| <b>pgm</b>            | Phosphoglycerate mutase                                       | KPG3     | 0.1    | mM                                                     | [46] |
| <b>pgm</b>            | Phosphoglycerate mutase                                       | KPG2     | 0.2    | mM                                                     | [46] |



|              |                                 |            |         |                                                        |      |
|--------------|---------------------------------|------------|---------|--------------------------------------------------------|------|
| <b>pgndh</b> | Phosphogluconate dehydrogenase  | V          | Fitted  | $\text{pmol}\cdot\text{min}^{-1}\cdot\text{cell}^{-1}$ |      |
| <b>pgndh</b> | Phosphogluconate dehydrogenase  | KNADP      | 0.0135  | mM                                                     | [20] |
| <b>pgndh</b> | Phosphogluconate dehydrogenase  | KiNADP     | 0.0048  | mM                                                     | [20] |
| <b>pgndh</b> | Phosphogluconate dehydrogenase  | KPgn       | 0.0292  | mM                                                     | [20] |
| <b>pgndh</b> | Phosphogluconate dehydrogenase  | KiPgn      | 2.176   | mM                                                     | [20] |
| <b>pgndh</b> | Phosphogluconate dehydrogenase  | KNADPH     | 0.00022 | mM                                                     | [20] |
| <b>pgndh</b> | Phosphogluconate dehydrogenase  | KiNADPH    | 0.0051  | mM                                                     | [20] |
| <b>pgndh</b> | Phosphogluconate dehydrogenase  | KRuI5P     | 0.02    | mM                                                     | [20] |
| <b>pgndh</b> | Phosphogluconate dehydrogenase  | KiRuI5P    | 0.02    | mM                                                     |      |
| <b>pimtr</b> | Phosphate mitochondrial carrier | V          | Fitted  | $\text{pmol}\cdot\text{min}^{-1}\cdot\text{cell}^{-1}$ |      |
| <b>pimtr</b> | Phosphate mitochondrial carrier | Keq        | 1       | –                                                      |      |
| <b>pimtr</b> | Phosphate mitochondrial carrier | KcPi       | 1.8     | mM                                                     | [7]  |
| <b>pimtr</b> | Phosphate mitochondrial carrier | KmPi       | 9.4     | mM                                                     | [7]  |
| <b>pitr</b>  | Phosphate carrier               | V          | Fitted  | $\text{pmol}\cdot\text{min}^{-1}\cdot\text{cell}^{-1}$ |      |
| <b>pitr</b>  | Phosphate carrier               | KPi        | 1       | mM                                                     |      |
| <b>pitr</b>  | Phosphate carrier               | Keq        | 1       | –                                                      |      |
| <b>pk</b>    | Pyruvate kinase                 | V          | Fitted  | $\text{pmol}\cdot\text{min}^{-1}\cdot\text{cell}^{-1}$ |      |
| <b>pk</b>    | Pyruvate kinase                 | p          | 0.7     | –                                                      | [5]  |
| <b>pk</b>    | Pyruvate kinase                 | KADP       | 0.3     | mM                                                     | [47] |
| <b>pk</b>    | Pyruvate kinase                 | nDPPEP     | 3.5     | –                                                      | [5]  |
| <b>pk</b>    | Pyruvate kinase                 | nPPEP      | 3.5     | –                                                      | [5]  |
| <b>pk</b>    | Pyruvate kinase                 | alfaDPbase | 0.08    | –                                                      | [5]  |
| <b>pk</b>    | Pyruvate kinase                 | alfaPbase  | 0.04    | –                                                      | [5]  |
| <b>pk</b>    | Pyruvate kinase                 | KDPFru16bP | 0.00016 | mM                                                     | [5]  |
| <b>pk</b>    | Pyruvate kinase                 | KPFru16bpP | 0.00035 | mM                                                     | [5]  |

|                |                                  |           |         |                                            |      |
|----------------|----------------------------------|-----------|---------|--------------------------------------------|------|
| <b>pk</b>      | Pyruvate kinase                  | nefru16bp | 1.8     | _                                          | [5]  |
| <b>pk</b>      | Pyruvate kinase                  | KminPEP   | 0.08    | mM                                         | [5]  |
| <b>pk</b>      | Pyruvate kinase                  | KDPPEP    | 0.58    | mM                                         | [5]  |
| <b>pk</b>      | Pyruvate kinase                  | KPEP      | 1.1     | mM                                         | [5]  |
| <b>pk</b>      | Pyruvate kinase                  | alfaend   | 1       | _                                          | [5]  |
| <b>pk</b>      | Pyruvate kinase                  | alfaDP    | 1       | _                                          | [5]  |
| <b>pk</b>      | Pyruvate kinase                  | alfaP     | 1.1     | _                                          | [5]  |
| <b>pk</b>      | Pyruvate kinase                  | KiPyr     | 1       | mM                                         |      |
| <b>ppase</b>   | Pyrophosphatase                  | V         | Fitted  | pmol·min <sup>-1</sup> ·cell <sup>-1</sup> |      |
| <b>ppase</b>   | Pyrophosphatase                  | KPPi      | 0.005   | mM                                         | [5]  |
| <b>rpi</b>     | Ribose-5-phosphate isomerase     | V         | 2       | pmol·min <sup>-1</sup> ·cell <sup>-1</sup> |      |
| <b>rpi</b>     | Ribose-5-phosphate isomerase     | Keq       | 1.20    | _                                          | [20] |
| <b>rpi</b>     | Ribose-5-phosphate isomerase     | KRu5P     | 0.78    | mM                                         | [20] |
| <b>rpi</b>     | Ribose-5-phosphate isomerase     | KRib5P    | 2.2     | mM                                         | [20] |
| <b>rpi</b>     | Ribose-5-phosphate isomerase     | KiPGn     | 6       | mM                                         | [20] |
| <b>ru5pepi</b> | Ribulose-5-phosphate 4-epimerase | V         | 2       | pmol·min <sup>-1</sup> ·cell <sup>-1</sup> |      |
| <b>ru5pepi</b> | Ribulose-5-phosphate 4-epimerase | Keq       | 1.82    | _                                          | [20] |
| <b>ru5pepi</b> | Ribulose-5-phosphate 4-epimerase | KRu5P     | 0.19    | mM                                         | [20] |
| <b>ru5pepi</b> | Ribulose-5-phosphate 4-epimerase | KXyl5P    | 0.5     | mM                                         | [20] |
| <b>scs</b>     | Succinyl-CoA synthetase          | V         | Fitted  | pmol·min <sup>-1</sup> ·cell <sup>-1</sup> |      |
| <b>scs</b>     | Succinyl-CoA synthetase          | Keq       | 1.33333 | _                                          | [26] |
| <b>scs</b>     | Succinyl-CoA synthetase          | KSuCoA    | 0.086   | mM                                         |      |
| <b>scs</b>     | Succinyl-CoA synthetase          | KGDP      | 0.007   | mM                                         |      |
| <b>scs</b>     | Succinyl-CoA synthetase          | KPi       | 2.26    | mM                                         | [48] |
| <b>scs</b>     | Succinyl-CoA synthetase          | KSuc      | 0.49    | mM                                         | [48] |

|                            |                                                                           |        |         |                                            |      |
|----------------------------|---------------------------------------------------------------------------|--------|---------|--------------------------------------------|------|
| <b>scs</b>                 | Succinyl-CoA synthetase                                                   | KGTP   | 0.036   | mM                                         | [48] |
| <b>scs</b>                 | Succinyl-CoA synthetase                                                   | KCoA   | 0.036   | mM                                         | [48] |
| <b>sdh</b>                 | Succinate dehydrogenase                                                   | V      | Fitted  | pmol·min <sup>-1</sup> ·cell <sup>-1</sup> |      |
| <b>sdh</b>                 | Succinate dehydrogenase                                                   | Keq    | 1       | _                                          | [1]  |
| <b>sdh</b>                 | Succinate dehydrogenase                                                   | KiCoQ  | 0.01    | mM                                         |      |
| <b>sdh</b>                 | Succinate dehydrogenase                                                   | KSuc   | 0.03    | mM                                         | [49] |
| <b>sdh</b>                 | Succinate dehydrogenase                                                   | KiSuc  | 0.03    | mM                                         |      |
| <b>sdh</b>                 | Succinate dehydrogenase                                                   | KFum   | 0.025   | mM                                         | [49] |
| <b>sdh</b>                 | Succinate dehydrogenase                                                   | KiFum  | 0.025   | mM                                         |      |
| <b>sdh</b>                 | Succinate dehydrogenase                                                   | KiCoQH | 0.2     | mM                                         |      |
| <b>Ta/ta_inv1 /ta_inv2</b> | Transaldolase / Transaldolase invisible (1) / Transaldolase invisible (2) | e0     | Fitted  | pmol·cell <sup>-1</sup>                    |      |
| <b>Ta/ta_inv1 /ta_inv2</b> | Transaldolase / Transaldolase invisible (1) / Transaldolase invisible (2) | K1     | 113.595 | min <sup>-1</sup>                          | [50] |
| <b>Ta/ta_inv1 /ta_inv2</b> | Transaldolase / Transaldolase invisible (1) / Transaldolase invisible (2) | K2     | 2887.37 | min <sup>-1</sup>                          | [50] |
| <b>Ta/ta_inv1 /ta_inv2</b> | Transaldolase / Transaldolase invisible (1) / Transaldolase invisible (2) | K3     | 5000    | min <sup>-1</sup>                          | [50] |
| <b>Ta/ta_inv1 /ta_inv2</b> | Transaldolase / Transaldolase invisible (1) / Transaldolase invisible (2) | K4     | 622860  | min <sup>-1</sup>                          | [50] |
| <b>Ta/ta_inv1 /ta_inv2</b> | Transaldolase / Transaldolase invisible (1) / Transaldolase invisible (2) | K5     | 5300    | min <sup>-1</sup>                          | [50] |
| <b>Ta/ta_inv1 /ta_inv2</b> | Transaldolase / Transaldolase invisible (1) / Transaldolase invisible (2) | K6     | 5000    | min <sup>-1</sup>                          | [50] |
| <b>Ta/ta_inv1 /ta_inv2</b> | Transaldolase / Transaldolase invisible (1) / Transaldolase invisible (2) | Kr1    | 5000    | min <sup>-1</sup>                          | [50] |
| <b>Ta/ta_inv1 /ta_inv2</b> | Transaldolase / Transaldolase invisible (1) / Transaldolase invisible (2) | Kr2    | 5300    | min <sup>-1</sup>                          | [50] |

|                                                 |                                                                                                                                                           |       |                         |                                            |      |
|-------------------------------------------------|-----------------------------------------------------------------------------------------------------------------------------------------------------------|-------|-------------------------|--------------------------------------------|------|
| <b>Ta/ta_inv1 /ta_inv2</b>                      | Transaldolase / Transaldolase invisible (1) / Transaldolase invisible (2)                                                                                 | Kr3   | 6.85627*10 <sup>8</sup> | min <sup>-1</sup>                          | [50] |
| <b>Ta/ta_inv1 /ta_inv2</b>                      | Transaldolase / Transaldolase invisible (1) / Transaldolase invisible (2)                                                                                 | Kr4   | 5000                    | min <sup>-1</sup>                          | [50] |
| <b>Ta/ta_inv1 /ta_inv2</b>                      | Transaldolase / Transaldolase invisible (1) / Transaldolase invisible (2)                                                                                 | Kr5   | 1770                    | min <sup>-1</sup>                          | [50] |
| <b>Ta/ta_inv1 /ta_inv2</b>                      | Transaldolase / Transaldolase invisible (1) / Transaldolase invisible (2)                                                                                 | Kr6   | 0.0622865               | min <sup>-1</sup>                          | [50] |
| <b>tim</b>                                      | Triose-phosphate isomerase                                                                                                                                | V     | 2                       | pmol·min <sup>-1</sup> ·cell <sup>-1</sup> |      |
| <b>tim</b>                                      | Triose-phosphate isomerase                                                                                                                                | Keq   | 0.045                   | _                                          | [1]  |
| <b>tim</b>                                      | Triose-phosphate isomerase                                                                                                                                | KDhaP | 0.59                    | mM                                         | [51] |
| <b>tim</b>                                      | Triose-phosphate isomerase                                                                                                                                | KGraP | 0.4                     | mM                                         | [51] |
| <b>tim</b>                                      | Triose-phosphate isomerase                                                                                                                                | Keq   | 0.045                   | _                                          |      |
| <b>tk1/tk2/tk3/tk_inv1/tk_inv2/<br/>tk_inv3</b> | Transketolase (1) / Transketolase (2) / Transketolase (3) /<br>Transketolase invisible (1) / Transketolase invisible (2) /<br>Transketolase invisible (3) | e0    | Fitted                  | pmol·cell <sup>-1</sup> <sub>1</sub>       |      |
| <b>tk1/tk2/tk3/tk_inv1/tk_inv2/<br/>tk_inv3</b> | Transketolase (1) / Transketolase (2) / Transketolase (3) /<br>Transketolase invisible (1) / Transketolase invisible (2) /<br>Transketolase invisible (3) | K1    | 1.07902*10 <sup>7</sup> | min <sup>-1</sup>                          | [50] |
| <b>tk1/tk2/tk3/tk_inv1/tk_inv2/<br/>tk_inv3</b> | Transketolase (1) / Transketolase (2) / Transketolase (3) /<br>Transketolase invisible (1) / Transketolase invisible (2) /<br>Transketolase invisible (3) | K2    | 5300                    | min <sup>-1</sup>                          | [50] |
| <b>tk1/tk2/tk3/tk_inv1/tk_inv2/<br/>tk_inv3</b> | Transketolase (1) / Transketolase (2) / Transketolase (3) /<br>Transketolase invisible (1) / Transketolase invisible (2) /<br>Transketolase invisible (3) | K3    | 5000                    | min <sup>-1</sup>                          | [50] |
| <b>tk1/tk2/tk3/tk_inv1/tk_inv2/<br/>tk_inv3</b> | Transketolase (1) / Transketolase (2) / Transketolase (3) /<br>Transketolase invisible (1) / Transketolase invisible (2) /<br>Transketolase invisible (3) | K4    | 11760.9                 | min <sup>-1</sup>                          | [50] |

|                                                 |                                                                                                                                                           |     |         |                   |      |
|-------------------------------------------------|-----------------------------------------------------------------------------------------------------------------------------------------------------------|-----|---------|-------------------|------|
| <b>tk1/tk2/tk3/tk_inv1/tk_inv2/<br/>tk_inv3</b> | Transketolase (1) / Transketolase (2) / Transketolase (3) /<br>Transketolase invisible (1) / Transketolase invisible (2) /<br>Transketolase invisible (3) | K5  | 5300    | min <sup>-1</sup> | [50] |
| <b>tk1/tk2/tk3/tk_inv1/tk_inv2/<br/>tk_inv3</b> | Transketolase (1) / Transketolase (2) / Transketolase (3) /<br>Transketolase invisible (1) / Transketolase invisible (2) /<br>Transketolase invisible (3) | K6  | 5000    | min <sup>-1</sup> | [50] |
| <b>tk1/tk2/tk3/tk_inv1/tk_inv2/<br/>tk_inv3</b> | Transketolase (1) / Transketolase (2) / Transketolase (3) /<br>Transketolase invisible (1) / Transketolase invisible (2) /<br>Transketolase invisible (3) | K7  | 63384.6 | min <sup>-1</sup> | [50] |
| <b>tk1/tk2/tk3/tk_inv1/tk_inv2/<br/>tk_inv3</b> | Transketolase (1) / Transketolase (2) / Transketolase (3) /<br>Transketolase invisible (1) / Transketolase invisible (2) /<br>Transketolase invisible (3) | K8  | 98806.8 | min <sup>-1</sup> | [50] |
| <b>tk1/tk2/tk3/tk_inv1/tk_inv2/<br/>tk_inv3</b> | Transketolase (1) / Transketolase (2) / Transketolase (3) /<br>Transketolase invisible (1) / Transketolase invisible (2) /<br>Transketolase invisible (3) | K9  | 5000    | min <sup>-1</sup> | [50] |
| <b>tk1/tk2/tk3/tk_inv1/tk_inv2/<br/>tk_inv3</b> | Transketolase (1) / Transketolase (2) / Transketolase (3) /<br>Transketolase invisible (1) / Transketolase invisible (2) /<br>Transketolase invisible (3) | Kr1 | 5000    | min <sup>-1</sup> | [50] |
| <b>tk1/tk2/tk3/tk_inv1/tk_inv2/<br/>tk_inv3</b> | Transketolase (1) / Transketolase (2) / Transketolase (3) /<br>Transketolase invisible (1) / Transketolase invisible (2) /<br>Transketolase invisible (3) | Kr2 | 5300    | min <sup>-1</sup> | [50] |
| <b>tk1/tk2/tk3/tk_inv1/tk_inv2/<br/>tk_inv3</b> | Transketolase (1) / Transketolase (2) / Transketolase (3) /<br>Transketolase invisible (1) / Transketolase invisible (2) /<br>Transketolase invisible (3) | Kr3 | 3098.97 | min <sup>-1</sup> | [50] |
| <b>tk1/tk2/tk3/tk_inv1/tk_inv2/<br/>tk_inv3</b> | Transketolase (1) / Transketolase (2) / Transketolase (3) /<br>Transketolase invisible (1) / Transketolase invisible (2) /<br>Transketolase invisible (3) | Kr4 | 5000    | min <sup>-1</sup> | [50] |
| <b>tk1/tk2/tk3/tk_inv1/tk_inv2/<br/>tk_inv3</b> | Transketolase (1) / Transketolase (2) / Transketolase (3) /<br>Transketolase invisible (1) / Transketolase invisible (2) /<br>Transketolase invisible (3) | Kr5 | 1770    | min <sup>-1</sup> | [50] |

|                                                 |                                                                                                                                                           |         |                         |                                            |      |
|-------------------------------------------------|-----------------------------------------------------------------------------------------------------------------------------------------------------------|---------|-------------------------|--------------------------------------------|------|
| <b>tk1/tk2/tk3/tk_inv1/tk_inv2/<br/>tk_inv3</b> | Transketolase (1) / Transketolase (2) / Transketolase (3) /<br>Transketolase invisible (1) / Transketolase invisible (2) /<br>Transketolase invisible (3) | Kr6     | 5.88567*10 <sup>7</sup> | min <sup>-1</sup>                          | [50] |
| <b>tk1/tk2/tk3/tk_inv1/tk_inv2/<br/>tk_inv3</b> | Transketolase (1) / Transketolase (2) / Transketolase (3) /<br>Transketolase invisible (1) / Transketolase invisible (2) /<br>Transketolase invisible (3) | Kr7     | 5000                    | min <sup>-1</sup>                          | [50] |
| <b>tk1/tk2/tk3/tk_inv1/tk_inv2/<br/>tk_inv3</b> | Transketolase (1) / Transketolase (2) / Transketolase (3) /<br>Transketolase invisible (1) / Transketolase invisible (2) /<br>Transketolase invisible (3) | Kr8     | 1.46659*10 <sup>6</sup> | min <sup>-1</sup>                          | [50] |
| <b>tk1/tk2/tk3/tk_inv1/tk_inv2/<br/>tk_inv3</b> | Transketolase (1) / Transketolase (2) / Transketolase (3) /<br>Transketolase invisible (1) / Transketolase invisible (2) /<br>Transketolase invisible (3) | Kr9     | 36.4257                 | min <sup>-1</sup>                          | [50] |
| <b>transa</b>                                   | Transaminase                                                                                                                                              | V       | Fitted                  | pmol·min <sup>-1</sup> ·cell <sup>-1</sup> |      |
| <b>transa</b>                                   | Transaminase                                                                                                                                              | Keq     | 1                       | –                                          |      |
| <b>transa</b>                                   | Transaminase                                                                                                                                              | KKg     | 1.25                    | mM                                         |      |
| <b>transa</b>                                   | Transaminase                                                                                                                                              | KGlu    | 5                       | mM                                         |      |
| <b>transa</b>                                   | Transaminase                                                                                                                                              | KiAsp   | 2                       | mM                                         |      |
| <b>trik</b>                                     | Triokinase                                                                                                                                                | V       | Fitted                  | pmol·min <sup>-1</sup> ·cell <sup>-1</sup> |      |
| <b>trik</b>                                     | Triokinase                                                                                                                                                | KiATP   | 0.2                     | mM                                         |      |
| <b>trik</b>                                     | Triokinase                                                                                                                                                | KGra    | 0.012                   | mM                                         |      |
| <b>trik</b>                                     | Triokinase                                                                                                                                                | KiGra   | 0.012                   | mM                                         |      |
| <b>ugt</b>                                      | UDP-glucuronosyltransferase                                                                                                                               | V       | Fitted                  | pmol·min <sup>-1</sup> ·cell <sup>-1</sup> |      |
| <b>ugt</b>                                      | UDP-glucuronosyltransferase                                                                                                                               | Keq     | 0.31                    | mM                                         | [5]  |
| <b>ugt</b>                                      | UDP-glucuronosyltransferase                                                                                                                               | KUTP    | 0.563                   | mM                                         | [5]  |
| <b>ugt</b>                                      | UDP-glucuronosyltransferase                                                                                                                               | KiUTP   | 0.563                   | mM                                         |      |
| <b>ugt</b>                                      | UDP-glucuronosyltransferase                                                                                                                               | KGlc1P  | 0.172                   | mM                                         | [5]  |
| <b>ugt</b>                                      | UDP-glucuronosyltransferase                                                                                                                               | KiGlc1P | 0.172                   | mM                                         |      |

|            |                             |          |       |    |     |
|------------|-----------------------------|----------|-------|----|-----|
| <b>ugt</b> | UDP-glucuronosyltransferase | KPPi     | 0.166 | mM | [5] |
| <b>ugt</b> | UDP-glucuronosyltransferase | KiPPi    | 0.166 | mM |     |
| <b>ugt</b> | UDP-glucuronosyltransferase | KUDPGlc  | 0.05  | mM | [5] |
| <b>ugt</b> | UDP-glucuronosyltransferase | KiUDPGlc | 0.05  | mM |     |

### References

1. Reich JG, Sel'kov EE. Energy Metabolism of the Cell. London: Academic press INC. (London); 1981.
2. Rakhmanova TI, Popova TN. Regulation of 2-oxoglutarate metabolism in rat liver by NADP-isocitrate dehydrogenase and aspartate aminotransferase. *Biochemistry (Mosc)*. 2006;71(2):211-7. PubMed PMID: 16489927.
3. Guarriero-Bobyleva V, Volpi-Becchi MA, Masini A. Parallel partial purification of cytoplasmic and mitochondrial aconitate hydratases from rat liver. *Eur J Biochem*. 1973;34(3):455-8. PubMed PMID: 4736701.
4. Tanabe T, Nakanishi S, Hashimoto T, Ogiwara H, Nikawa J, Numa S. Acetyl-CoA carboxylase from rat liver. *Methods Enzymol*. 1981;71 Pt C:5-16. Epub 1981/01/01. PubMed PMID: 6116163.
5. Konig M, Bulik S, Holzhutter HG. Quantifying the contribution of the liver to glucose homeostasis: a detailed kinetic model of human hepatic glucose metabolism. *PLoS Comput Biol*. 2012;8(6):e1002577. PubMed PMID: 22761565.
6. Luz CM, Konig I, Schirmer RH, Frank R. Human cytosolic adenylate kinase allelozymes; purification and characterization. *Biochim Biophys Acta*. 1990;1038(1):80-4.
7. Palmieri F. Mitochondrial carrier proteins. *FEBS Lett*. 1994;346(1):48-54. PubMed PMID: 8206158.
8. Wells TN, Saxty BA. Redox control of catalysis in ATP-citrate lysate from rat liver. *Eur J Biochem*. 1992;204(1):249-55. Epub 1992/02/15. PubMed PMID: 1740136.
9. Mueggler PA, Wolfe RG. Malate dehydrogenase. Kinetic studies of substrate activation of supernatant enzyme by L-malate. *Biochemistry*. 1978;17(22):4615-20. Epub 1978/10/31. PubMed PMID: 215188.
10. McReynolds MS, Kitto GB. Purification and properties of *Drosophila* malate dehydrogenases. *Biochim Biophys Acta*. 1970;198(2):165-75.
11. Lin JJ, Yang TH, Wahlstrand BD, Fields PA, Somero GN. Phylogenetic relationships and biochemical properties of the duplicated cytosolic and mitochondrial isoforms of malate dehydrogenase from a teleost fish, *Sphyrna* *idiastes*. *J Mol Evol*. 2002;54(1):107-17.
12. Kurz LC, Shah S, Frieden C, Nakra T, Stein RE, Drysdale GR, et al. Catalytic strategy of citrate synthase: subunit interactions revealed as a consequence of a single amino acid change in the oxaloacetate binding site. *Biochemistry*. 1995;34(41):13278-88. PubMed PMID: 7577912.
13. Rider CC, Taylor CB. Enolase isoenzymes in rat tissues. Electrophoretic, chromatographic, immunological and kinetic properties. *Biochim Biophys Acta*. 1974;365(1):285-300. PubMed PMID: 4413246.

14. Rangan VS, Smith S. Alteration of the substrate specificity of the malonyl-CoA/acetyl-CoA:acyl carrier protein S-acyltransferase domain of the multifunctional fatty acid synthase by mutation of a single arginine residue. *J Biol Chem.* 1997;272(18):11975-8. Epub 1997/05/02. PubMed PMID: 9115261.
15. Taketa K, Pogell BM. Allosteric Inhibition of Rat Liver Fructose 1,6-Diphosphatase by Adenosine 5'-Monophosphate. *J Biol Chem.* 1965;240:651-62. PubMed PMID: 14275118.
16. Okar DA, Manzano A, Navarro-Sabate A, Riera L, Bartrons R, Lange AJ. PFK-2/FBPase-2: maker and breaker of the essential biofactor fructose-2,6-bisphosphate. *Trends Biochem Sci.* 2001;26(1):30-5. Epub 2001/02/13. doi: S0968-0004(00)01699-6 [pii]. PubMed PMID: 11165514.
17. Hill RL, Teipel JW. *The Enzymes.* 3rd ed. Boyer PD, ed, editor1971. 539-71 p.
18. Asipu A, Hayward BE, O'Reilly J, Bonthron DT. Properties of normal and mutant recombinant human ketohexokinases and implications for the pathogenesis of essential fructosuria. *Diabetes.* 2003;52(9):2426-32. Epub 2003/08/28. PubMed PMID: 12941785.
19. Sestoft L, Fleron P. Determination of the kinetic constants of fructose transport and phosphorylation in the perfused rat liver. *Biochim Biophys Acta.* 1974;345(1):27-38. Epub 1974/04/12. doi: 0005-2736(74)90242-9 [pii]. PubMed PMID: 4365063.
20. Sabate L, Franco R, Canela EI, Centelles JJ, Cascante M. A model of the pentose phosphate pathway in rat liver cells. *Mol Cell Biochem.* 1995;142(1):9-17. Epub 1995/01/12. PubMed PMID: 7753046.
21. Lambeir AM, Loiseau AM, Kuntz DA, Vellieux FM, Michels PA, Opperdoes FR. The cytosolic and glycosomal glyceraldehyde-3-phosphate dehydrogenase from *Trypanosoma brucei*. Kinetic properties and comparison with homologous enzymes. *Eur J Biochem.* 1991;198(2):429-35. PubMed PMID: 2040304.
22. Vandercammen A, Van Schaftingen E. Competitive inhibition of liver glucokinase by its regulatory protein. *Eur J Biochem.* 1991;200(2):545-51. Epub 1991/09/01. PubMed PMID: 1889417.
23. Monasterio O, Cardenas ML. Kinetic studies of rat liver hexokinase D ('glucokinase') in non-co-operative conditions show an ordered mechanism with MgADP as the last product to be released. *The Biochemical journal.* 2003;371(Pt 1):29-38. PubMed PMID: 12513690.
24. Veiga-da-Cunha M, Van Schaftingen E. Identification of fructose 6-phosphate- and fructose 1-phosphate-binding residues in the regulatory protein of glucokinase. *J Biol Chem.* 2002;277(10):8466-73. Epub 2002/01/05. doi: 10.1074/jbc.M105984200 M105984200 [pii]. PubMed PMID: 11756407.
25. Thorens B, Mueckler M. Glucose transporters in the 21st Century. *Am J Physiol Endocrinol Metab.* 2009;298(2):E141-5. PubMed PMID: 20009031.
26. Goldberg RN, Tewari YB, Bhat TN. Thermodynamics of enzyme-catalyzed reactions--a database for quantitative biochemistry. *Bioinformatics.* 2004;20(16):2874-7. Epub 004 May 14.
27. Ostro MJ, Fondy TP. Isolation and characterization of multiple molecular forms of cytosolic NAD-linked glycerol-3-phosphate dehydrogenase from normal and neoplastic rabbit tissues. *J Biol Chem.* 1977;252(15):5575-83. Epub 1977/08/10. PubMed PMID: 195955.
28. Dawson AP, Thorne CJ. L-3-glycerophosphate dehydrogenase from pig brain mitochondria. *Methods Enzymol.* 1975;41:254-9. Epub 1975/01/01. doi: S0076-6879(75)41058-8 [pii]. PubMed PMID: 1128264.



29. Kanno H, Fujii H, Miwa S. Expression and enzymatic characterization of human glucose phosphate isomerase (GPI) variants accounting for GPI deficiency. *Blood Cells Mol Dis*. 1998;24(1):54-61. PubMed PMID: 9616041.
30. Bzymek KP, Colman RF. Role of alpha-Asp181, beta-Asp192, and gamma-Asp190 in the distinctive subunits of human NAD-specific isocitrate dehydrogenase. *Biochemistry*. 2007;46(18):5391-7. PubMed PMID: 17432878.
31. Sheu KF, Blass JP. The alpha-ketoglutarate dehydrogenase complex. *Ann N Y Acad Sci*. 1999;893:61-78. Epub 2000/02/15. PubMed PMID: 10672230.
32. Wang YC, Wang ST, Li C, Liu WH, Chen PR, Chen LY, et al. The role of N286 and D320 in the reaction mechanism of human dihydrolipoamide dehydrogenase (E3) center domain. *J Biomed Sci*. 2007;14(2):203-10. PubMed PMID: 17171578.
33. Koike K, Suematsu T, Ehara M. Cloning, overexpression and mutagenesis of cDNA encoding dihydrolipoamide succinyltransferase component of the porcine 2-oxoglutarate dehydrogenase complex. *Eur J Biochem*. 2000;267(10):3005-16. PubMed PMID: 10806400.
34. Edlund GL, Halestrap AP. The kinetics of transport of lactate and pyruvate into rat hepatocytes. Evidence for the presence of a specific carrier similar to that in erythrocytes. *The Biochemical journal*. 1988;249(1):117-26. Epub 1988/01/01. PubMed PMID: 3342001; PubMed Central PMCID: PMC1148674.
35. *Eichner RD*. l(+)-Lactate dehydrogenase from *Homarus americanus*. *Methods in Enzymology*. 1982;89:359-62.
36. Nakae Y, Stoward PJ. Kinetic parameters of lactate dehydrogenase in liver and gastrocnemius determined by three quantitative histochemical methods. *J Histochem Cytochem*. 1997;45(10):1427-31. Epub 1997/10/06. PubMed PMID: 9313804.
37. Pettit SM, Nealon DA, Henderson AR. Purification of lactate dehydrogenase isoenzyme-5 from human liver. *Clin Chem*. 1981;27(1):88-93. Epub 1981/01/01. PubMed PMID: 7449128.
38. Zelewski M, Swierczynski J. Malic enzyme in human liver. Intracellular distribution, purification and properties of cytosolic isozyme. *Eur J Biochem*. 1991;201(2):339-45. Epub 1991/10/15. PubMed PMID: 1935931.
39. Hung HC, Kuo MW, Chang GG, Liu GY. Characterization of the functional role of allosteric site residue Asp102 in the regulatory mechanism of human mitochondrial NAD(P)<sup>+</sup>-dependent malate dehydrogenase (malic enzyme). *The Biochemical journal*. 2005;392(Pt 1):39-45. PubMed PMID: 15989682.
40. Jitrapakdee S, Walker ME, Wallace JC. Functional expression, purification, and characterization of recombinant human pyruvate carboxylase. *Biochem Biophys Res Commun*. 1999;266(2):512-7.
41. Warren GB, Tipton KF. Pig liver pyruvate carboxylase. Purification, properties and cation specificity. *The Biochemical journal*. 1974;139(2):297-310. PubMed PMID: 4447611.
42. Scrutton MC, Utter MF. Pyruvate carboxylase. IX. Some properties of the activation by certain acyl derivatives of coenzyme A. *J Biol Chem*. 1967;242(8):1723-35. Epub 1967/04/25. PubMed PMID: 6024765.
43. Johnson TA, Holyoak T. Increasing the conformational entropy of the Omega-loop lid domain in phosphoenolpyruvate carboxykinase impairs catalysis and decreases catalytic fidelity. *Biochemistry*. 49(25):5176-87.
44. Laloux M, Van Schaftingen E, Francois J, Hers HG. Phosphate dependency of phosphofructokinase 2. *Eur J Biochem*. 1985;148(1):155-9. Epub 1985/04/01. PubMed PMID: 2983989.

45. Szabo J, Varga A, Flachner B, Konarev PV, Svergun DI, Zavodszky P, et al. Communication between the nucleotide site and the main molecular hinge of 3-phosphoglycerate kinase. *Biochemistry*. 2008;47(26):6735-44. PubMed PMID: 18540639.
46. Bartrons R, Carreras J. Purification and characterization of phosphoglycerate mutase isozymes from pig heart. *Biochim Biophys Acta*. 1982;708(2):167-77. PubMed PMID: 6293580.
47. Yamada K, Noguchi T. Nutrient and hormonal regulation of pyruvate kinase gene expression. *The Biochemical journal*. 1999;337 ( Pt 1):1-11. Epub 1998/12/17. PubMed PMID: 9854017; PubMed Central PMCID: PMC1219928.
48. Johnson JD, Muhonen WW, Lambeth DO. Characterization of the ATP- and GTP-specific succinyl-CoA synthetases in pigeon. The enzymes incorporate the same alpha-subunit. *J Biol Chem*. 1998;273(42):27573-9. PubMed PMID: 9765290.
49. Grivennikova VG, Gavrikova EV, Timoshin AA, Vinogradov AD. Fumarate reductase activity of bovine heart succinate-ubiquinone reductase. New assay system and overall properties of the reaction. *Biochim Biophys Acta*. 1993;1140(3):282-92. Epub 1993/01/08. PubMed PMID: 8417779.
50. Selivanov VA, Meshalkina LE, Solovjeva ON, Kuchel PW, Ramos-Montoya A, Kochetov GA, et al. Rapid simulation and analysis of isotopomer distributions using constraints based on enzyme mechanisms: an example from HT29 cancer cells. *Bioinformatics*. 2005;21(17):3558-64. doi: 10.1093/bioinformatics/bti573.
51. Snyder R, Lee EW. Triosephosphate isomerase from human and horse liver. *Methods Enzymol*. 1975;41:430-4. PubMed PMID: 1168838.
