# Supplementary material for: HepatoDyn: A Dynamic Model of Hepatocyte Metabolism That Integrates 13C Isotopomer Data
Source: PubMed Central journal article supplement (PMC4849781; doi:10.1371/journal.pcbi.1004899), 2016-04-28
Supplement: pcbi.1004899.s016.pdf [file pcbi.1004899.s016.pdf]

### S1 Text

**Kinetic laws used for the reactions associated with aldolase activity.** This text describes the kinetic laws used for the aldolase reactions and how they have been constructed.

Firstly, the laws for rate of consumption and production of fructose-1-6 bisphosphate (FBP), fructose-1-phosphate (Fru1P), dihydroxyacetone phosphate (DHAP), glyceraldehyde 3-phosphate (GraP), and glyceraldehyde (Gra) were derived following the King-Altman method [1]. The first step of this method is to represent the mechanism in a closed scheme showing all enzyme species (free enzyme and enzyme complexes) and possible reactions. Specifically for the aldolase enzyme, the enzyme species are free Enzyme (E), enzyme complexed with fructose-1-6 bisphosphate (E-FBP), enzyme complexed with fructose-1-phosphate (E-Fru1P) and enzyme complexed with dihydroxyacetone phosphate (E-DHAP). The mechanism can be written as follows:

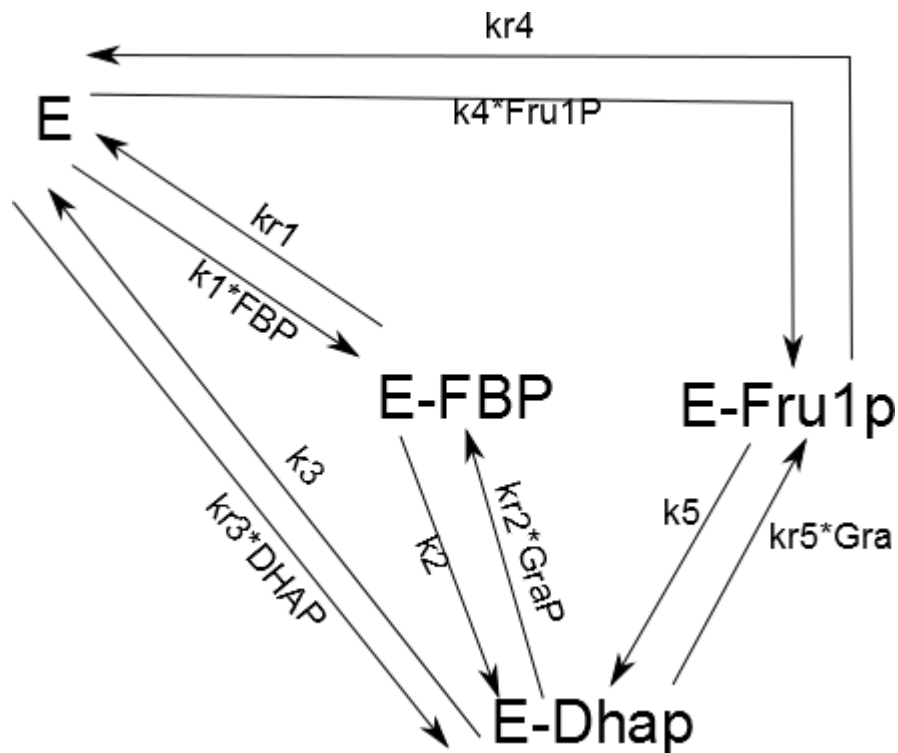

Where rate constants are accounting for the forward ( $k_1, k_2, k_3, k_4, k_5$ ) and reverse reactions ( $kr_1, kr_2, kr_3, kr_4, kr_5$ ). From this scheme the relative concentrations of each enzyme species are derived:

$$\frac{[E]}{e_0} = \frac{(k_2 k_3 k_5 + k_3 k_5 kr_1 + \text{grap} k_5 kr_1 kr_2 + k_2 k_3 kr_4 + k_3 kr_1 kr_4 + \text{grap} kr_1 kr_2 kr_4 + \text{gra} k_2 kr_4 kr_5 + \text{gra} kr_1 kr_4 kr_5)}{\text{Denom}}$$

$$\frac{[E_{FBP}]}{e_0} = (fbp_{k1 k3 k5} + fbp_{grap k1 k5 kr2} + fru1p_{grap k4 k5 kr2} + dhap_{grap k5 kr2 kr3} + fbp_{k1 k3 kr4} + fbp_{grap k1 kr2 kr4} + dhap_{grap kr2 kr3 kr4} + fbp_{gra k1 kr4 kr5})/Denom$$

$$\frac{[E_{DHAP}]}{e_0} = (fbp_{k1 k2 k5} + fru1p_{k2 k4 k5} + fru1p_{k4 k5 kr1} + dhap_{k2 k5 kr3} + dhap_{k5 kr1 kr3} + fbp_{k1 k2 kr4} + dhap_{k2 kr3 kr4} + dhap_{kr1 kr3 kr4})/Denom$$

$$\frac{[E_{Fr1P}]}{e_0} = (fru1p_{k2 k3 k4} + fru1p_{k3 k4 kr1} + fru1p_{grap k4 kr1 kr2} + fbp_{gra k1 k2 kr5} + fru1p_{gra k2 k4 kr5} + fru1p_{gra k4 kr1 kr5} + dhap_{gra k2 kr3 kr5} + dhap_{gra kr1 kr3 kr5})/Denom$$

Where Denom is:

$$\begin{aligned} Denom = & k2 k3 k5 + k3 k5 kr1 + grap k5 kr1 kr2 + k2 k3 kr4 + k3 kr1 kr4 \\ & + grap kr1 kr2 kr4 + gra k2 kr4 kr5 + gra kr1 kr4 kr5 \\ & + fbp k1 k3 k5 + fbp_{grap k1 k5 kr2} + fru1p_{grap k4 k5 kr2} \\ & + dhap_{grap k5 kr2 kr3} + fbp_{k1 k3 kr4} + fbp_{grap k1 kr2 kr4} \\ & + dhap_{grap kr2 kr3 kr4} + fbp_{gra k1 kr4 kr5} + fbp_{k1 k2 k5} \\ & + fru1p_{k2 k4 k5} + fru1p_{k4 k5 kr1} + dhap_{k2 k5 kr3} \\ & + dhap_{k5 kr1 kr3} + fbp_{k1 k2 kr4} + dhap_{k2 kr3 kr4} \\ & + dhap_{kr1 kr3 kr4} + fru1p_{k2 k3 k4} + fru1p_{k3 k4 kr1} \\ & + fru1p_{grap k4 kr1 kr2} + fbp_{gra k1 k2 kr5} + fru1p_{gra k2 k4 kr5} \\ & + fru1p_{gra k4 kr1 kr5} + dhap_{gra k2 kr3 kr5} \\ & + dhap_{gra kr1 kr3 kr5} \end{aligned}$$

Then, knowing the relative concentration of each enzyme species allows the construction of a kinetic law for the forward ( $v_1, v_2, v_3, v_4, v_5$ ) or reverse ( $v_{r1}, v_{r2}, v_{r3}, v_{r4}, v_{r5}$ ) reaction accounting for the consumption or production of each metabolite, specifically:

Fru16bP Consumption ( $v_1$ ):

$$\begin{aligned} v_1 = e_0 * \frac{k_1 * fbp * [E]}{Denom} \\ = k_1 * fbp * (k_2 k_3 k_5 + k_3 k_5 kr_1 + grap k_5 kr_1 kr_2 + k_2 k_3 kr_4 + k_3 kr_1 kr_4 + grap kr_1 kr_2 kr_4 + gra k_2 kr_4 kr_5 + gra kr_1 kr_4 kr_5)/Denom \end{aligned}$$

Fru16bP Production ( $v_{r1}$ ):

$$\begin{aligned}
vr1 &= e0 * \frac{kr1 * [Efbp]}{Denom} \\
&= kr1 \\
&\quad * (fbp k1 k3 k5 + fbp grap k1 k5 kr2 + fru1p grap k4 k5 kr2 \\
&\quad + dhap grap k5 kr2 kr3 + fbp k1 k3 kr4 + fbp grap k1 kr2 kr4 \\
&\quad + dhap grap kr2 kr3 kr4 + fbp gra k1 kr4 kr5)/Denom
\end{aligned}$$

GraP Production (v2):

$$\begin{aligned}
v2 &= \frac{e0 * k2 * [Efbp]}{Denom} \\
&= e0 * k2 \\
&\quad * (fbp k1 k3 k5 + fbp grap k1 k5 kr2 + fru1p grap k4 k5 kr2 \\
&\quad + dhap grap k5 kr2 kr3 + fbp k1 k3 kr4 + fbp grap k1 kr2 kr4 \\
&\quad + dhap grap kr2 kr3 kr4 + fbp gra k1 kr4 kr5)/Denom
\end{aligned}$$

GraP Consumption (vr2):

$$\begin{aligned}
vr2 &= \frac{e0 * kr2 * [E DHAP] * grap}{Denom} \\
&= e0 * kr2 * grap * (fbp k1 k2 k5 + fru1p k2 k4 k5 \\
&\quad + fru1p k4 k5 kr1 + dhap k2 k5 kr3 + dhap k5 kr1 kr3 \\
&\quad + fbp k1 k2 kr4 + dhap k2 kr3 kr4 + dhap kr1 kr3 kr4)/Denom
\end{aligned}$$

DHAP Production (v3):

$$\begin{aligned}
v3 &= \frac{e0 * k3 * [E DHAP]}{Denom} \\
&= e0 * k3 * (fbp k1 k2 k5 + fru1p k2 k4 k5 + fru1p k4 k5 kr1 \\
&\quad + dhap k2 k5 kr3 + dhap k5 kr1 kr3 + fbp k1 k2 kr4 \\
&\quad + dhap k2 kr3 kr4 + dhap kr1 kr3 kr4)/Denom
\end{aligned}$$

Dhap consumption (vr3):

$$\begin{aligned}
vr3 &= \frac{e0 * kr3 * dhap[E]}{Denom} \\
&= e0 * kr3 * dhap(k2 k3 k5 + k3 k5 kr1 + grap k5 kr1 kr2 \\
&\quad + k2 k3 kr4 + k3 kr1 kr4 + grap kr1 kr2 kr4 + gra k2 kr4 kr5 \\
&\quad + gra kr1 kr4 kr5)/Denom
\end{aligned}$$

Fru1P Consumption (v4):

$$\begin{aligned}
v4 &= e0 * \frac{k4 * [E] * fru1p}{Denom} \\
&= k4 * fru1p(k2 k3 k5 + k3 k5 kr1 + grap k5 kr1 kr2 + k2 k3 kr4 \\
&\quad + k3 kr1 kr4 + grap kr1 kr2 kr4 + gra k2 kr4 kr5 \\
&\quad + gra kr1 kr4 kr5)/Denom
\end{aligned}$$

Fr1P Production (vr4):

$$\begin{aligned}
vr4 &= e0 * \frac{kr4 * [Efru1p]}{\text{Denom}} \\
&= kr4 * (fru1p k2 k3 k4 + fru1p k3 k4 kr1 \\
&\quad + fru1p grap k4 kr1 kr2 + fbp gra k1 k2 kr5 \\
&\quad + fru1p gra k2 k4 kr5 + fru1p gra k4 kr1 kr5 \\
&\quad + dhap gra k2 kr3 kr5 + dhap gra kr1 kr3 kr5) / \text{Denom}
\end{aligned}$$

Gra Production (v5):

$$\begin{aligned}
v5 &= \frac{e0 * k5 * [Efru1p]}{\text{Denom}} \\
&= e0 * k5 * (fru1p k2 k3 k4 + fru1p k3 k4 kr1 \\
&\quad + fru1p grap k4 kr1 kr2 + fbp gra k1 k2 kr5 \\
&\quad + fru1p gra k2 k4 kr5 + fru1p gra k4 kr1 kr5 \\
&\quad + dhap gra k2 kr3 kr5 + dhap gra kr1 kr3 kr5) / \text{Denom}
\end{aligned}$$

Gra Consumption (vr5):

$$\begin{aligned}
vr5 &= \frac{e0 * kr5 * [EDhap] * Gra}{\text{Denom}} \\
&= e0 * kr5 * Gra * (fbp k1 k2 k5 + fru1p k2 k4 k5 \\
&\quad + fru1p k4 k5 kr1 + dhap k2 k5 kr3 + dhap k5 kr1 kr3 \\
&\quad + fbp k1 k2 kr4 + dhap k2 kr3 kr4 + dhap kr1 kr3 kr4) / \text{Denom}
\end{aligned}$$

To obtain the kinetic rate equations that describe the fluxes that propagate labels through the aldolase reaction from the previously derived reaction rates, we followed a previously described method [2]. Firstly, a system of equations is written defining the following fractions: fraction of enzyme-complexed DHAP originated from FBP (Pdhapfromfbp), enzyme-complexed DHAP originated from Fr1p (Pdhapfromfru1p), enzyme-complexed DHAP originated from DHAP (Pdhapfromdhap), enzyme-complexed Fr1P originated from FBP (Fr1ppfromfbp), enzyme-complexed Fr1p originated from Fr1p (fr1pfromfru1p), enzyme-complexed Fr1p originated from DHAP (Fr1pfromdhap), enzyme-complexed FBP originated from FBP (Pfbpfromfbp), enzyme-complexed FBP originated from dhap (Pfbpfromfru1p), and enzyme-complexed FBP originated from DHAP (Pfbpfromdhap).

$$Pdhapfromfbp = (v2 * Pfbpfromfbp + v5 * Pfr1pfromfbp) / (v5 + v2 + vr3)$$

$$Pdhapfromfru1p = (v5 * Pfru1pfromfru1p + v2 * Pfbpfromfru1p) / (v5 + v2 + vr3)$$

$$Pfbpfromfbp = (vr2 * Pdhapfromfbp + v1) / (v1 + vr2)$$

$$Pfru1pfromfru1p = (v4 + vr5 * Pdhapfromfru1p) / (v4 + vr5)$$

$$Pfbpfromfru1p = vr2 * Pdhapfromfru1p / (v1 + vr2)$$

$$Pfr1pfromfbp = vr5 * Pdhapfromfbp / (v4 + vr5)$$

$$Pfbpfromdhap = Pdhapfromdhap * vr2 / (v1 + vr2)$$

$$Pfr1pfromdhap = Pdhapfromdhap * \frac{vr5}{v4 + vr5}$$

$$1 = P_{dhapfromfbp} + P_{dhapfromfru1p} + P_{dhapfromdhap}$$

$$1 = P_{fbpfromfbp} + P_{fbpfromfru1p} + P_{fbpfromdhap}$$

$$1 = P_{fru1pfromfru1p} + P_{fru1pfromfbp} + P_{fru1pfromdhap}$$

Solving the system gives:

$$P_{dhapfromfbp}$$

$$= \frac{v_1 v_2 (v_4 + v_5)}{v_1 v_2 v_4 + v_1 v_4 v_5 + v_4 v_5 v_2 + v_1 v_4 v_3 + v_4 v_2 v_3 + v_1 v_2 v_5 + v_1 v_3 v_5 + v_2 v_3 v_5}$$

$$P_{fbpfromfbp}$$

$$= \frac{v_1 (v_2 v_4 + v_4 v_5 + v_4 v_3 + v_2 v_5 + v_3 v_5)}{v_1 v_2 v_4 + v_1 v_4 v_5 + v_4 v_5 v_2 + v_1 v_4 v_3 + v_4 v_2 v_3 + v_1 v_2 v_5 + v_1 v_3 v_5 + v_2 v_3 v_5}$$

$$P_{dhapfromfru1p}$$

$$= \frac{v_4 v_5 (v_1 + v_2)}{v_1 v_2 v_4 + v_1 v_4 v_5 + v_4 v_5 v_2 + v_1 v_4 v_3 + v_4 v_2 v_3 + v_1 v_2 v_5 + v_1 v_3 v_5 + v_2 v_3 v_5}$$

$$P_{fru1pfromfru1p}$$

$$= \frac{v_4 (v_1 v_2 + v_1 v_5 + v_5 v_2 + v_1 v_3 + v_2 v_3)}{v_1 v_2 v_4 + v_1 v_4 v_5 + v_4 v_5 v_2 + v_1 v_4 v_3 + v_4 v_2 v_3 + v_1 v_2 v_5 + v_1 v_3 v_5 + v_2 v_3 v_5}$$

$$P_{fbpfromfru1p}$$

$$= \frac{v_4 v_5 v_2}{v_1 v_2 v_4 + v_1 v_4 v_5 + v_4 v_5 v_2 + v_1 v_4 v_3 + v_4 v_2 v_3 + v_1 v_2 v_5 + v_1 v_3 v_5 + v_2 v_3 v_5}$$

$$P_{fru1pfromfbp}$$

$$= \frac{v_1 v_2 v_5}{v_1 v_2 v_4 + v_1 v_4 v_5 + v_4 v_5 v_2 + v_1 v_4 v_3 + v_4 v_2 v_3 + v_1 v_2 v_5 + v_1 v_3 v_5 + v_2 v_3 v_5}$$

$$P_{fbpfromdhap}$$

$$= - \frac{(-v_4 v_2 v_3 - v_2 v_3 v_5)}{(v_1 v_2 v_4 + v_1 v_4 v_5 + v_4 v_5 v_2 + v_1 v_4 v_3 + v_4 v_2 v_3 + v_1 v_2 v_5 + v_1 v_3 v_5 + v_2 v_3 v_5)}$$

$$P_{fru1pfromdhap}$$

$$= \frac{(v_1 v_3 + v_2 v_3) v_5}{v_1 v_2 v_4 + v_1 v_4 v_5 + v_4 v_5 v_2 + v_1 v_4 v_3 + v_4 v_2 v_3 + v_1 v_2 v_5 + v_1 v_3 v_5 + v_2 v_3 v_5}$$

$$P_{dhapfromdhap}$$

$$= 1$$

$$= \frac{(v_4 v_5 (v_1 + v_2))}{(v_1 v_2 v_4 + v_1 v_4 v_5 + v_4 v_5 v_2 + v_1 v_4 v_3 + v_4 v_2 v_3 + v_1 v_2 v_5 + v_1 v_3 v_5 + v_2 v_3 v_5)}$$

$$= \frac{(v_1 v_2 (v_4 + v_5))}{(v_1 v_2 v_4 + v_1 v_4 v_5 + v_4 v_5 v_2 + v_1 v_4 v_3 + v_4 v_2 v_3 + v_1 v_2 v_5 + v_1 v_3 v_5 + v_2 v_3 v_5)}$$

Then, with these fractions it is possible to describe the flux through each of the eight possible aldolase reactions that will be involved in label propagation.

Reaction 1: FBP → GraP + DHAP

$$J_1 = P_{dhapfromfbp} * v_3$$

$$= \frac{v_3 * v_1 v_2 (v_4 + v_5)}{v_1 v_2 v_4 + v_1 v_4 v_5 + v_4 v_5 v_2 + v_1 v_4 v_3 + v_4 v_2 v_3 + v_1 v_2 v_5 + v_1 v_3 v_5 + v_2 v_3 v_5}$$

Reaction 2: GraP + DHAP → FBP

$$J_2 = P_{fbpfromdhap} * v_{r1}$$

$$= - \frac{(-v_4 v_{r2} v_{r3} - v_{r2} v_{r3} v_5)}{(v_1 v_2 v_4 + v_1 v_4 v_5 + v_4 v_5 v_{r2} + v_1 v_4 v_{r3} + v_4 v_{r2} v_{r3} + v_1 v_2 v_{r5} + v_1 v_{r3} v_{r5} + v_{r2} v_{r3} v_{r5})}$$

Reaction 3: Fru1P → Gra + DHAP

$$J_3 = P_{dhapfromfru1p} * v_3$$

$$= \frac{v_3 * v_4 v_5 (v_1 + v_{r2})}{v_1 v_2 v_4 + v_1 v_4 v_5 + v_4 v_5 v_{r2} + v_1 v_4 v_{r3} + v_4 v_{r2} v_{r3} + v_1 v_2 v_{r5} + v_1 v_{r3} v_{r5} + v_{r2} v_{r3} v_{r5}}$$

Reaction 4: DHAP + Gra → Fru1P

$$J_4 = P_{fr1pfromdhap} * v_{r4}$$

$$= \frac{v_{r4} * (v_1 v_{r3} + v_{r2} v_{r3}) v_{r5}}{v_1 v_2 v_4 + v_1 v_4 v_5 + v_4 v_5 v_{r2} + v_1 v_4 v_{r3} + v_4 v_{r2} v_{r3} + v_1 v_2 v_{r5} + v_1 v_{r3} v_{r5} + v_{r2} v_{r3} v_{r5}}$$

Reaction 5: FBP+Gra → GraP + Fru1P

$$J_4 = v_{r4} * P_{fr1pfromfbp}$$

$$= \frac{v_{r4} * v_1 v_2 v_{r5}}{v_1 v_2 v_4 + v_1 v_4 v_5 + v_4 v_5 v_{r2} + v_1 v_4 v_{r3} + v_4 v_{r2} v_{r3} + v_1 v_2 v_{r5} + v_1 v_{r3} v_{r5} + v_{r2} v_{r3} v_{r5}}$$

Reaction 6: GraP+Fru1P → FBP + Gra

$$J_6 = P_{fbpfromfru1p} * v_{r1}$$

$$= \frac{v_4 v_5 v_{r2}}{v_1 v_2 v_4 + v_1 v_4 v_5 + v_4 v_5 v_{r2} + v_1 v_4 v_{r3} + v_4 v_{r2} v_{r3} + v_1 v_2 v_{r5} + v_1 v_{r3} v_{r5} + v_{r2} v_{r3} v_{r5}}$$

Reaction 7 (Invisible reaction): FBP+GraP' ↔ GraP + FBP'

$$J_7 = \frac{v_2 * v_1}{v_1 + v_{r2}} - J_1 - J_4$$

Reaction 8 (Invisible reaction): Fru1P+Gra' ↔ Gra + Fru1P'

$$J_8 = \frac{v_5 * v_4}{v_1 + v_{r2}} - J_3 - J_6$$

Expanding these expressions with the consumption and production of metabolites derived from the King-Altman method generates the kinetic laws used in the model for each reaction, which can be used to simulate label propagation.

## References

1. Cornish-Bowden A (1995) Fundamentals of enzyme kinetics. London: Portland Press Ltd. xiii, 230 p. p.

2. Marin de Mas I, Selivanov VA, Marin S, Roca J, Orešič M, et al. (2011) Compartmentation of glycogen metabolism revealed from  $^{13}\text{C}$  isotopologue distributions. *BMC Systems Biology* 5: 175.
